# Supplementary material for: Highly Regioselective Protecting-Group-Free Synthesis of the Antimalarial Drug MMV693183
Source: PubMed Central journal article supplement (PMC10804412; doi:10.1021/acs.oprd.3c00353), 2023-12-09
Supplement: op3c00353_si_001.pdf [file op3c00353_si_001.pdf]

# Highly Regioselective Protecting Group-Free Synthesis of the Antimalarial Drug MMV693183

Pankaj V. Khairnar, Sarah L. Aleshire, Ravi Kumar Ongolu, Limei Jin, Michael G. Laidlaw, Kai

O. Donsbach, B. Frank Gupton, Ryan C. Nelson\*, Charles S. Shanahan\*

Medicines for All Institute, Virginia Commonwealth University, Richmond, VA, 23219, USA

\*Email: [shanahanc@vcu.edu](mailto:shanahanc@vcu.edu); [rmelsonchem@gmail.com](mailto:rmelsonchem@gmail.com)

**Table S1. Analytical HPLC-HILIC Method for the separation of 1<sup>st</sup> step regioisomers**

| <b>Structures &amp; IDs:</b>                                                                                          |                                                                                                            |                                                                                                                    |
|-----------------------------------------------------------------------------------------------------------------------|------------------------------------------------------------------------------------------------------------|--------------------------------------------------------------------------------------------------------------------|
| 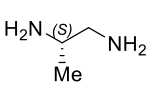<br><b>10</b><br>Diamine           | <br><b>4</b><br>Lactone | <br><b>11</b><br>Desired amide |
| <br><b>12</b><br>Undesired amide |                                                                                                            |                                                                                                                    |
| <b>Conditions:</b>                                                                                                    |                                                                                                            |                                                                                                                    |
| Column: Agilent Poroshell 120 HILIC-Z (3.0 x 100 mm, 2.7 μm)                                                          |                                                                                                            |                                                                                                                    |
| Mobile Phase A: Acetonitrile                                                                                          |                                                                                                            |                                                                                                                    |
| Mobile Phase B: 25 mM ammonium formate adjusted to pH 3.0 ± 0.1 with formic acid                                      |                                                                                                            |                                                                                                                    |
| Injection volume: 1 μL                                                                                                | Column temp: 30 °C                                                                                         | Flow rate: 1.0 mL/min                                                                                              |
| Detector wavelength(s): 210 nm                                                                                        |                                                                                                            |                                                                                                                    |
| LC Gradient Table:                                                                                                    |                                                                                                            | Sample preparation: Prepare samples at approximately 1.0 mg/mL in methanol                                         |
| Time (min)                                                                                                            | %A %B                                                                                                      |                                                                                                                    |

|      |     |     |
|------|-----|-----|
| 0.0  | 90% | 10% |
| 12.0 | 90% | 10% |

Post-run equilibration: N/A

### Retention Times

| Compound                              | Time (min) | Relative RF (mg/mL)* | Relative RF (M)* |
|---------------------------------------|------------|----------------------|------------------|
| Desired amide regioisomer <b>11</b>   | 6.6        |                      |                  |
| Undesired amide regioisomer <b>12</b> | 7.4        |                      |                  |

### Notes:

- Ensure thorough equilibration (thermal and mobile phase) prior to starting analyses

$$*Relative\ RF = \frac{(Analyte\ 2\ Conc. / Analyte\ 2\ Peak\ Area)}{(Analyte\ 1\ Conc. / Analyte\ 2\ Peak\ Area)}$$

### Representative Chromatogram(s) (attach additional chromatograms and spectra as needed)

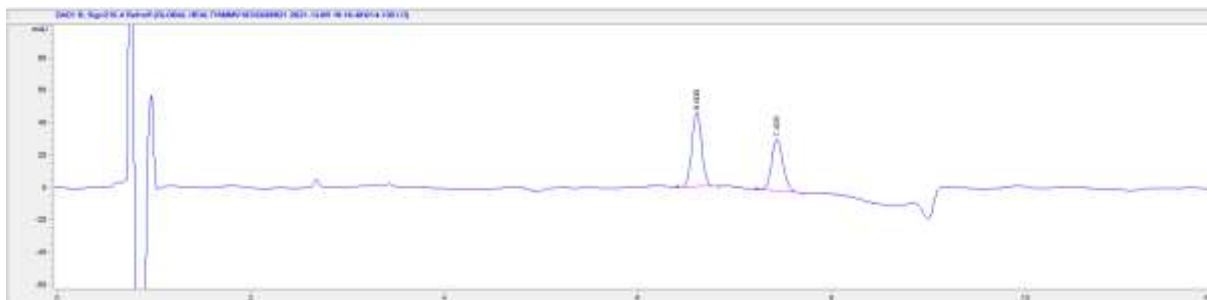

### Desired amide 11:

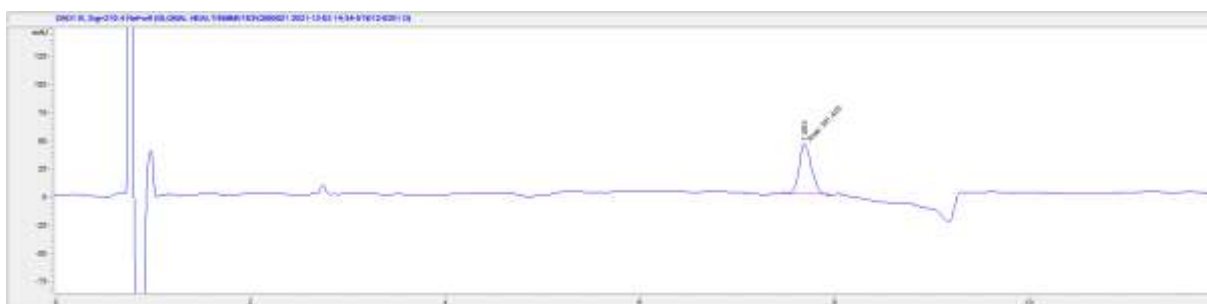

### Undesired amide 12:

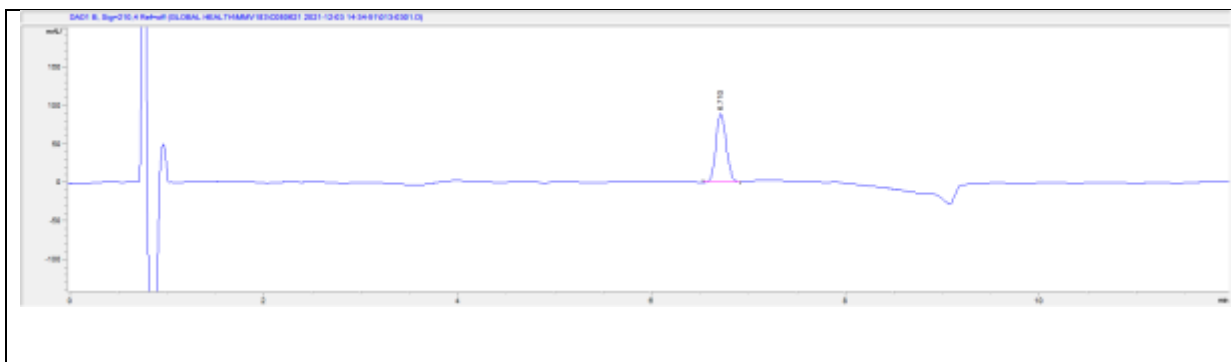

### Scheme S1. Step-II Pictures of Tartrate Salt Formation (18)

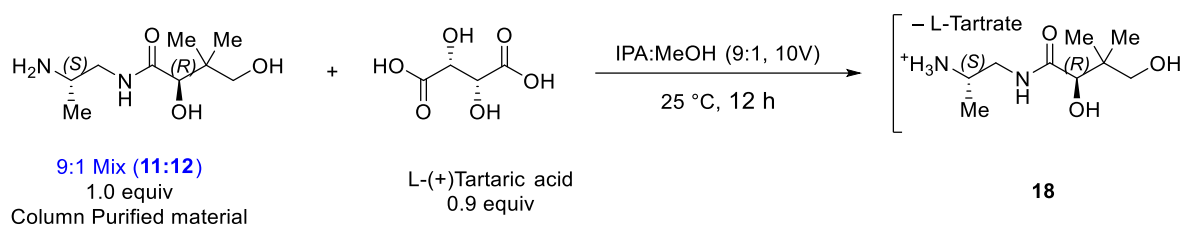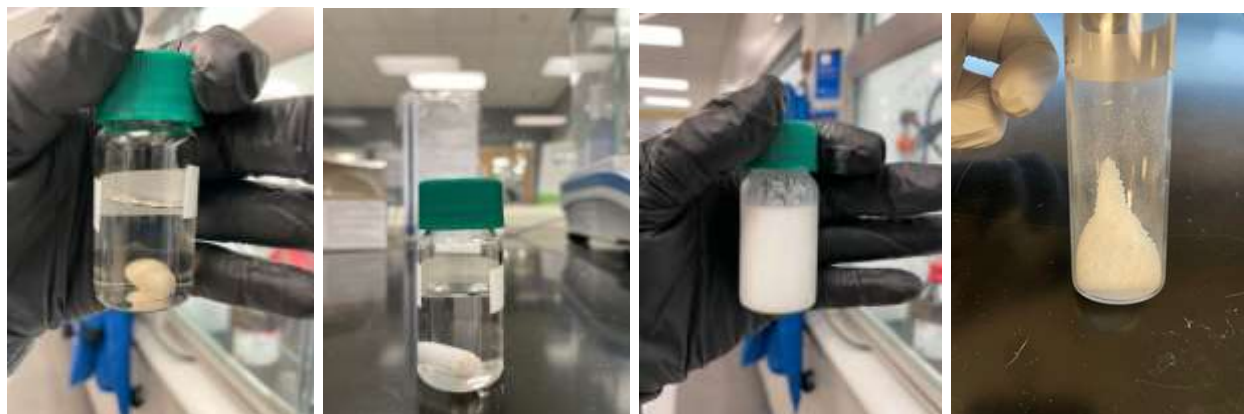

9:1 mix of regioisomers in 10 V of IPA:MeOH.

Immediately after addition of 0.9 eq. of L-(+)-tartaric acid

After 12 h, a white solid precipitates out.

Isolated pure desired tartrate salt after filtration and drying.

### Scheme S2. Step-III Pictures of N-Acylation Reaction

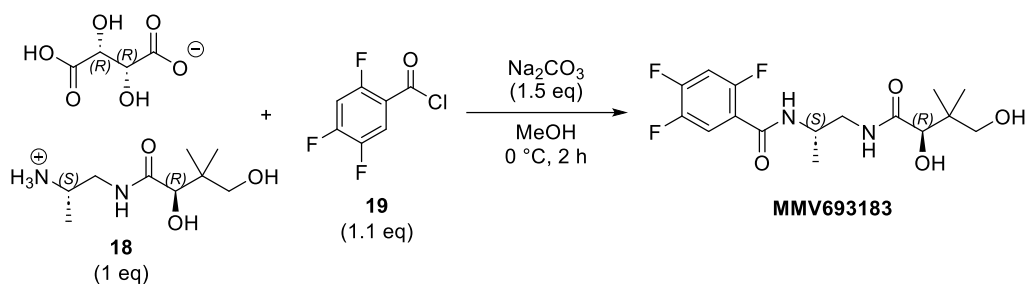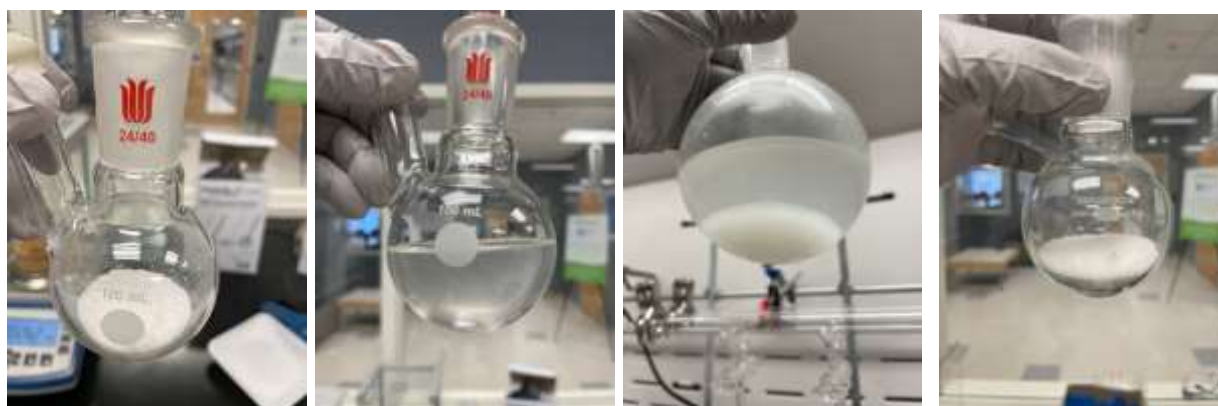

Pure Desired Tartrate salt **18**

Immediately after addition of 10 V of dry MeOH.

After stirring with  $\text{Na}_2\text{CO}_3$  at  $0^\circ\text{C}$  for 2h, salts precipitate out.

Isolated Desired-MMV693183 after column purification.

### Table S2. Analytical HPLC Method for the separation of 3<sup>rd</sup> step regioisomers

This HPLC method did not resolve the desired and undesired regioisomers of 1<sup>st</sup> step.

#### Structures & IDs:

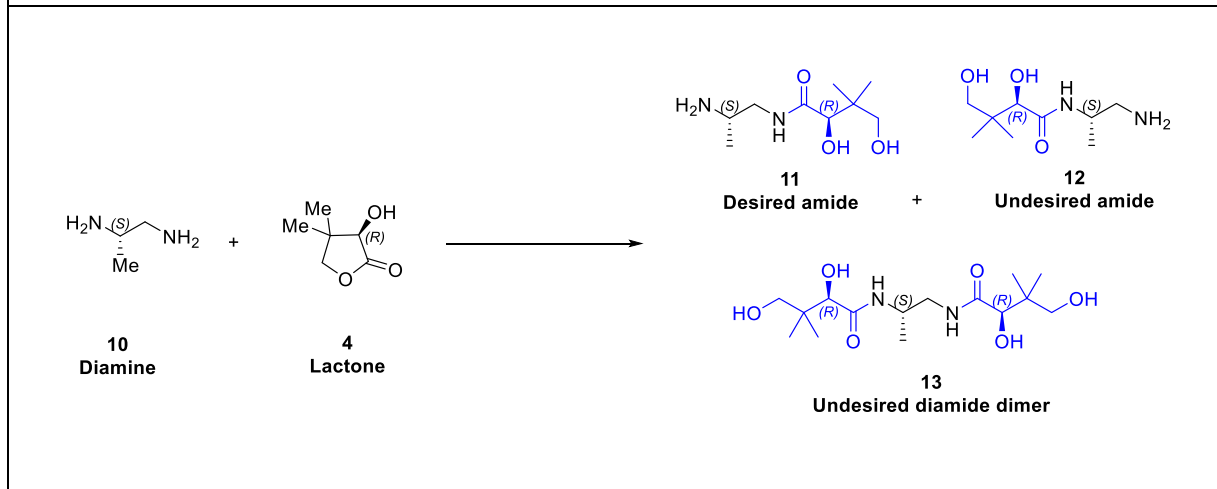

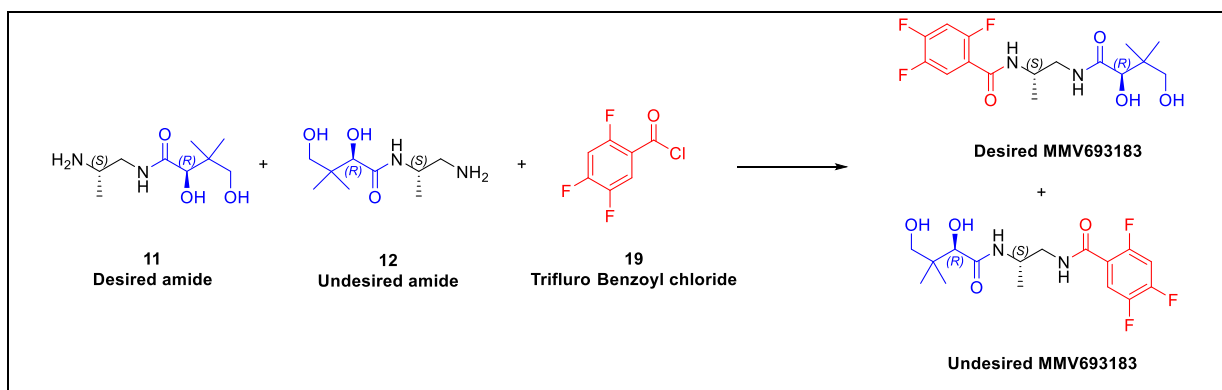

**Conditions:**

**Column:** Agilent Eclipse XDB-C18 (4.6 x 250 mm, 5 μm)

**Mobile Phase A:** 0.1% phosphoric acid in water (1 mL HPLC grade H<sub>3</sub>PO<sub>4</sub> in 1000 mL HPLC grade water)

**Mobile Phase B:** Methanol

**Injection volume:** 1 μL

**Column temp:** 40 °C

**Flow rate:** 1.5 mL/min

**Detector wavelength(s):** 210 nm

**LC Gradient Table:**

| Time (min) | %A  | %B  |
|------------|-----|-----|
| 0.0        | 90% | 10% |
| 0.5        | 90% | 10% |
| 5.0        | 55% | 45% |
| 14.0       | 55% | 45% |

Post-run equilibration: 4 min

**Sample preparation:** Prepare samples at approximately 1.0 mg/mL in ethanol. Step two samples will require sonication to help convert the trifluoro benzoyl chloride to its ethyl ester for monitoring.

**Retention Times**

| Compound                                              | Time (min) | Relative RF (mg/mL)* | Relative RF (M)* |
|-------------------------------------------------------|------------|----------------------|------------------|
| Desired amide regioisomer <b>11</b>                   | 2.3        |                      |                  |
| Undesired amide regioisomer <b>12</b>                 | 2.3        |                      |                  |
| Lactone <b>4</b>                                      | 4.5        |                      |                  |
| Diamide dimer <b>13</b>                               | 6.6        |                      |                  |
| Trifluoro benzoyl chloride (as ethyl ester) <b>19</b> | 10.1       |                      |                  |

|                                      |      |  |  |
|--------------------------------------|------|--|--|
| <b>Undesired MMV-183 regioisomer</b> | 11.5 |  |  |
| <b>Desired MMV-183 regioisomer</b>   | 11.8 |  |  |

**Notes:**

Trifluorobenzoyl chloride and benzoic acid have an RT of 11.7 if not converted to the ester. This would interfere with reaction monitoring.

$$*Relative\ RF = \frac{(Analyte\ 2\ Conc./Analyte\ 2\ Peak\ Area)}{(Analyte\ 1\ Conc./Analyte\ 2\ Peak\ Area)}$$

**Representative Chromatogram(s)** (attach additional chromatograms and spectra as needed)

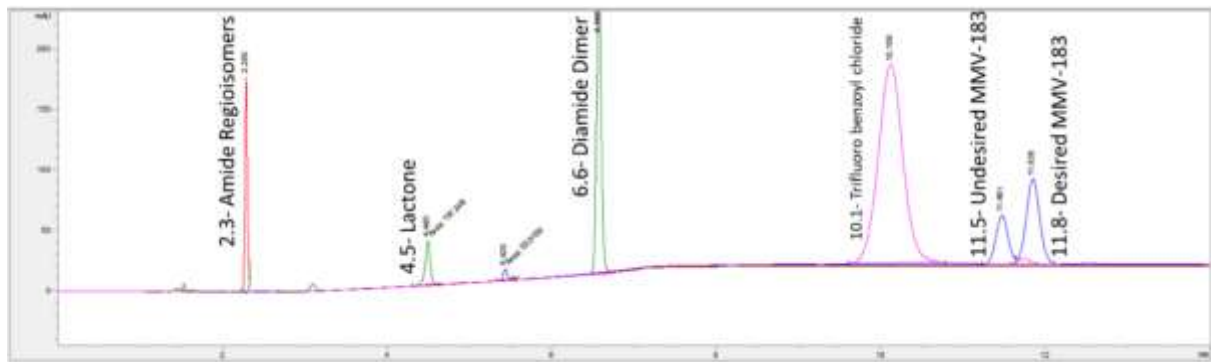

**MMV-183 regioisomers:**

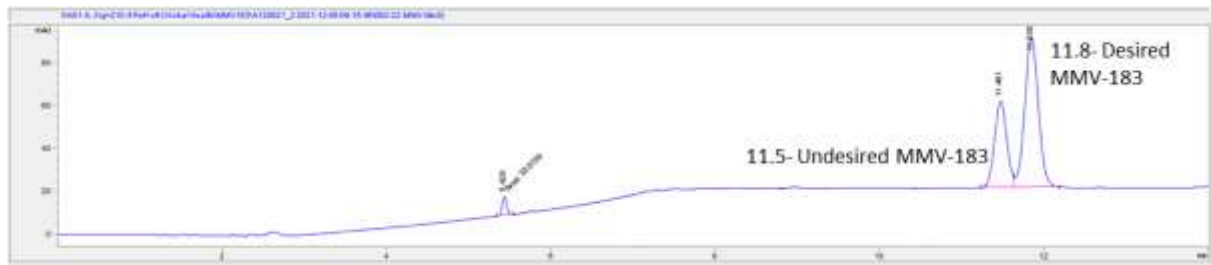

**Amide regioisomers 11+12 as a inseparable mixture:**

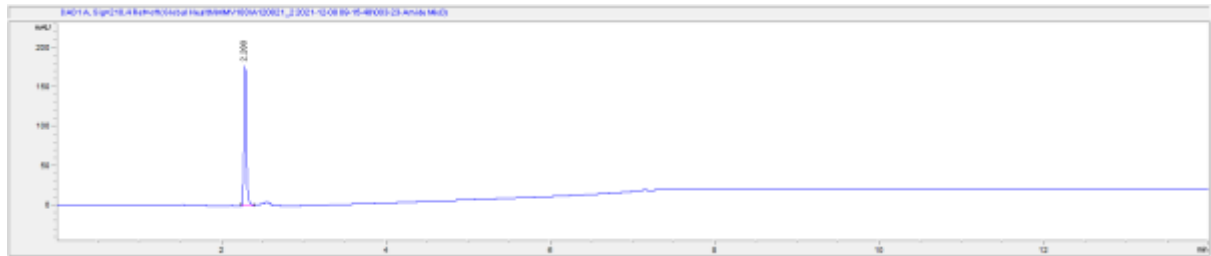

**Trifluoro benzoyl chloride UV:**

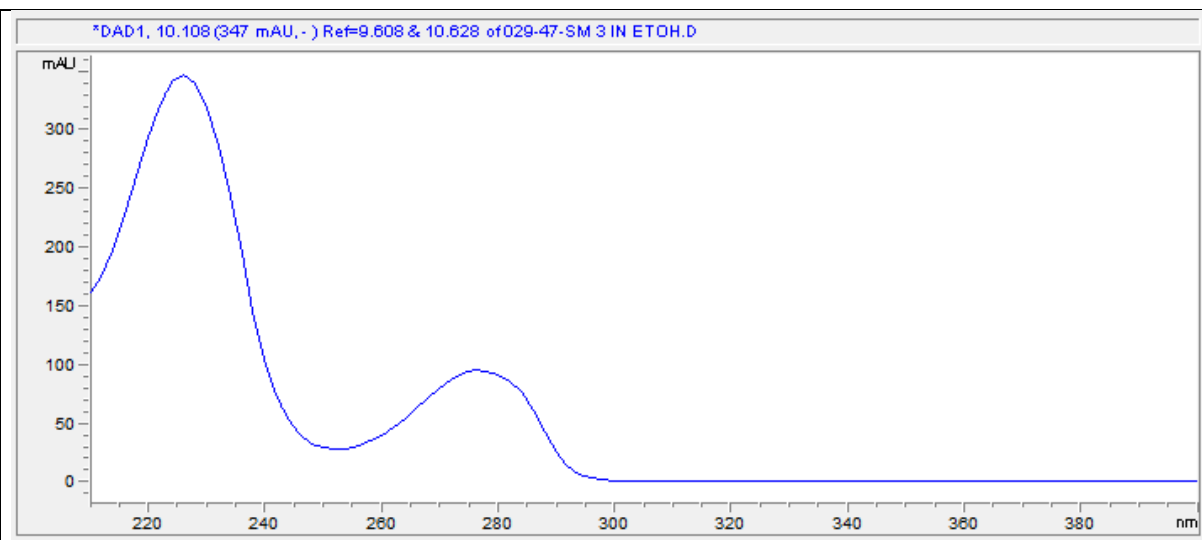

**Lactone UV:**

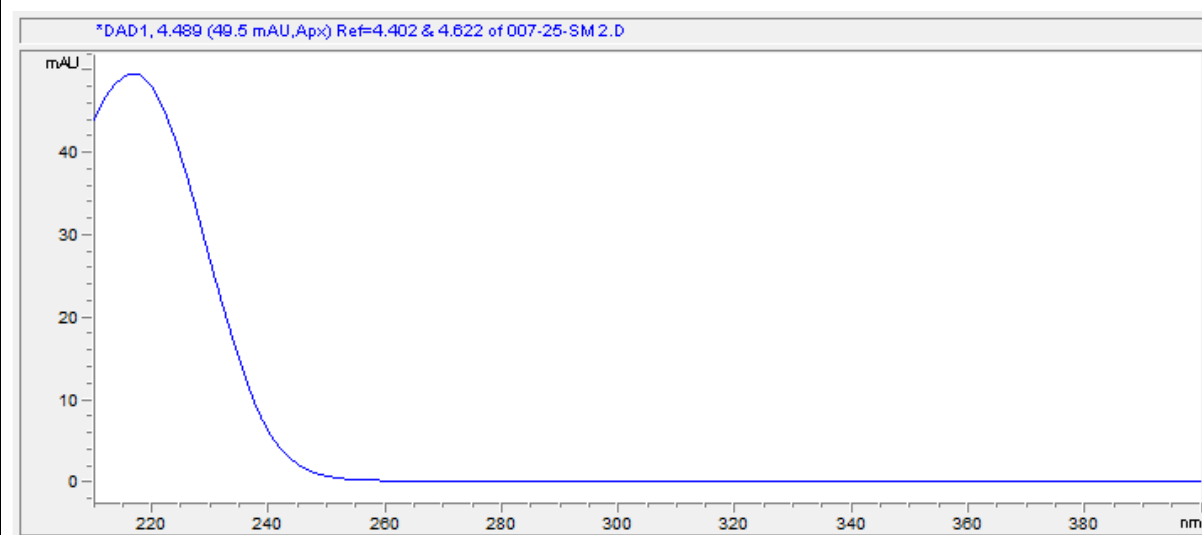

**Amide regioisomers and dimer UV:**

\*DAD1, 6.565 (221 mAU, -) Ref=4.645 & 6.738 of 004-24-PVK-140-C.D

\*DAD1, 2.458 (91.2 mAU, -) Ref=2.305 & 2.712 of 004-24-PVK-140-C.D

\*DAD1, 2.365 (59.0 mAU, -) Ref=2.305 & 2.712 of 004-24-PVK-140-C.D

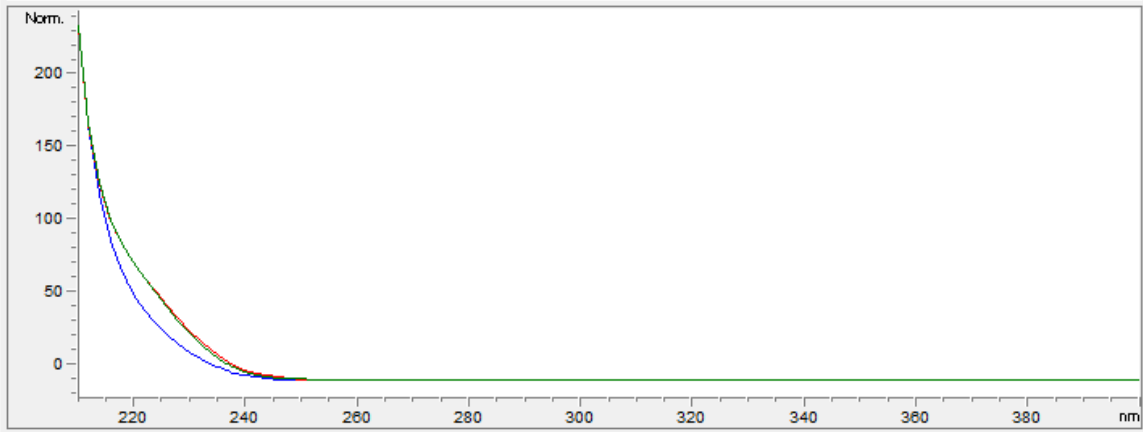

### MMV-183 regioisomers UV:

\*DAD1, 11.460 (42.1 mAU, Apx) Ref=11.227 & 12.154 of 002-22-MMV MIX.D

\*DAD1, 11.834 (72.2 mAU, -) Ref=11.227 & 12.154 of 002-22-MMV MIX.D

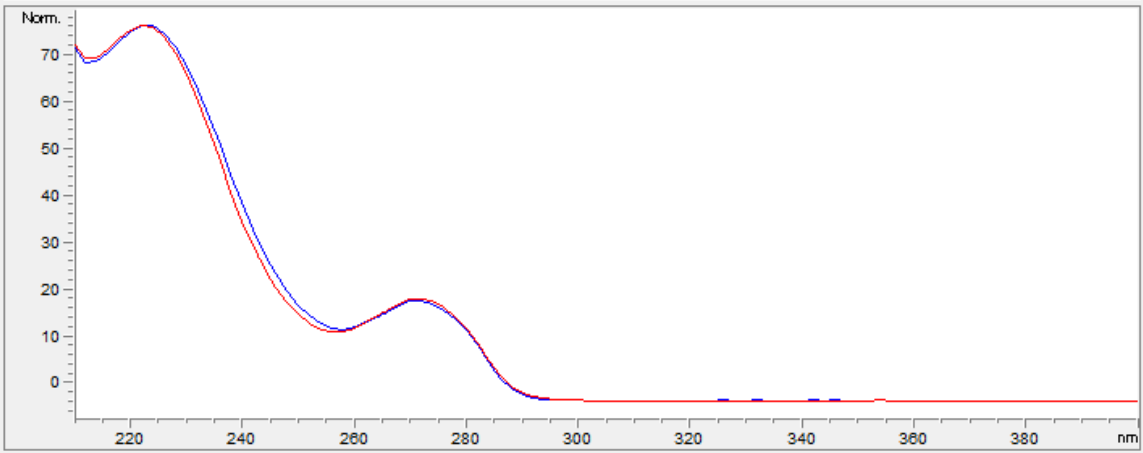



**For comparison, the undesired isomer of MMV693183 was prepared from pure compound 12:**

**Synthesis of N-((S)-2-((R)-2,4-dihydroxy-3,3-dimethylbutanamido)propyl)-2,4,5-trifluorobenzamide (MMV693183-Undesired)**

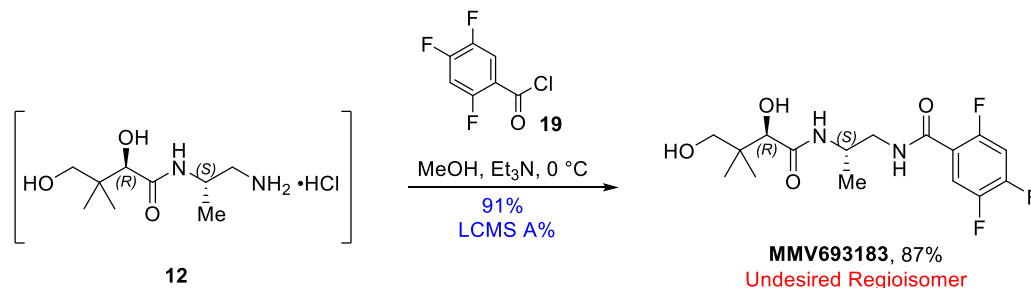

To an oven dried two-necks round bottom flask with magnetic stirrer was added HCl salt **12** (500 mg, 1.0 eq., 2.1 mmol) and dry MeOH (5.0 mL, salt **12** was completely soluble in MeOH) under nitrogen atmosphere. The mixture was cooled to 0 °C with an ice bath and Et<sub>3</sub>N (0.43 mL, 1.5 eq., 3.1 mmol) was added. The resulting mixture was allowed to stir for 15 mins at the same temperature. To this mixture was added trifluorobenzoyl chloride **19** (0.29 mL, 1.1 eq., 2.3 mmol) dropwise 0 °C and the resulting mixture was stirred for 1 h. After completion (monitored by TLC) the reaction mixture was allowed to warm to 25 °C. The organic solvent was removed under vacuum and the resulting crude mixture was purified by column chromatography (gradient: hexanes to 1:9 EtOAc:hexanes) to afford the pure undesired regioisomer of **MMV693183-undesired** ( 0.66 g, 87%).) to afford the pure undesired regioisomer of **MMV693183-undesired** ( 0.66 g, 87%), which exhibits different <sup>1</sup>H, <sup>13</sup>C and <sup>19</sup>F NMR and melting point.

<sup>1</sup>H NMR (600 MHz, CD<sub>3</sub>OD) δ/ppm: 7.74-7.66 (m, 1H), 7.34-7.27 (m, 1H), 4.21-4.13 (m, 1H), 3.87 (s, 1H), 3.54-3.32 (m, 4H), 1.21 (d, *J* = 6.7 Hz, 3H), 0.87 (s, 3H), 0.86 (s, 3H).

<sup>13</sup>C NMR (150 MHz, CD<sub>3</sub>OD) δ/ppm: 175.9, 164.8, 157.0 (ddd, *J* = 250.0, 10.0, 2.2 Hz), 153.1 (dt, *J* = 254.0, 13.8 Hz), 148.1 (ddd, *J* = 245.0, 13.0, 3.0 Hz), 120.7 (dt, *J* = 16.5, 4.4 Hz), 119.7 (dd, *J* = 21.0, 2.5 Hz), 107.6 (dd, *J* = 23.6, 8.0 Hz), 77.4, 70.2, 46.5, 40.3, 21.5, 20.9, 18.3.

<sup>19</sup>F NMR (564 MHz, CD<sub>3</sub>OD) δ/ppm: -114.3 (dd, *J* = 17.2, 6.5 Hz, 1F), -130.7 (dd, *J* = 22.6, 6.3 Hz, 1F), -142.6 (dd, *J* = 23.1, 6.4 Hz, 1F).

**HRMS (ESI)  $m/z$ :**  $[M + Na]^+$  Calculated for  $C_{16}H_{21}F_3N_2O_4Na$ : 385.1453; Found: 385.1462

**Melting Point:** 106 °C.

## II. $^1\text{H}$ , $^{19}\text{F}$ and $^{13}\text{C}$ NMR Spectra of all new compounds:

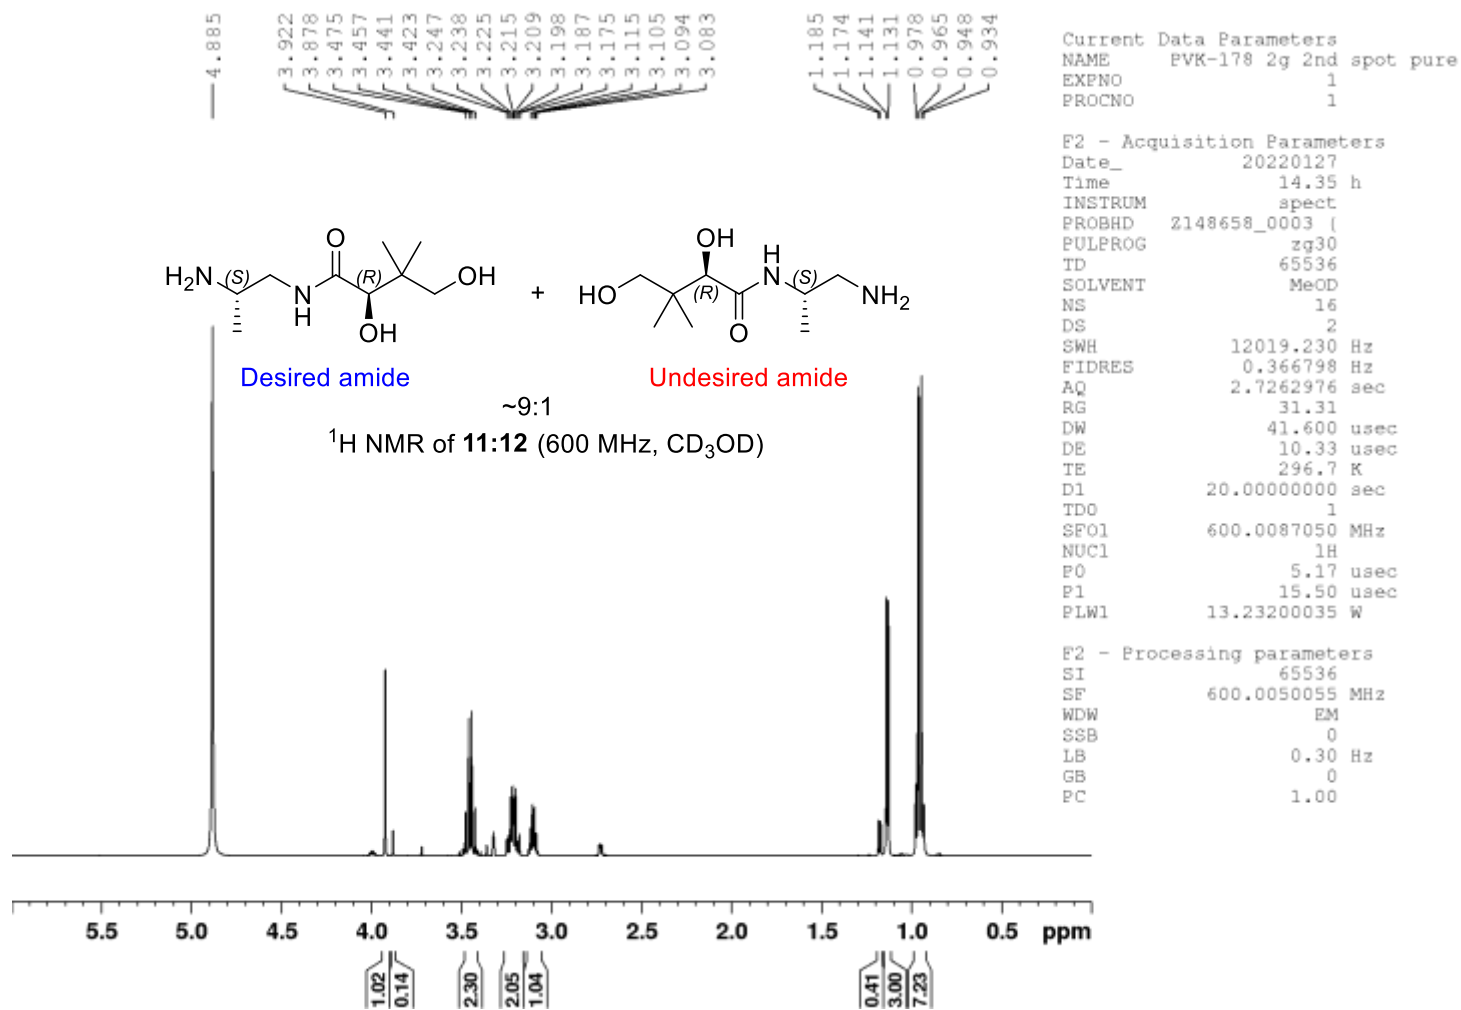

Fig S1.  $^1\text{H}$ NMR of compound 11 in  $\text{CD}_3\text{OD}$ .

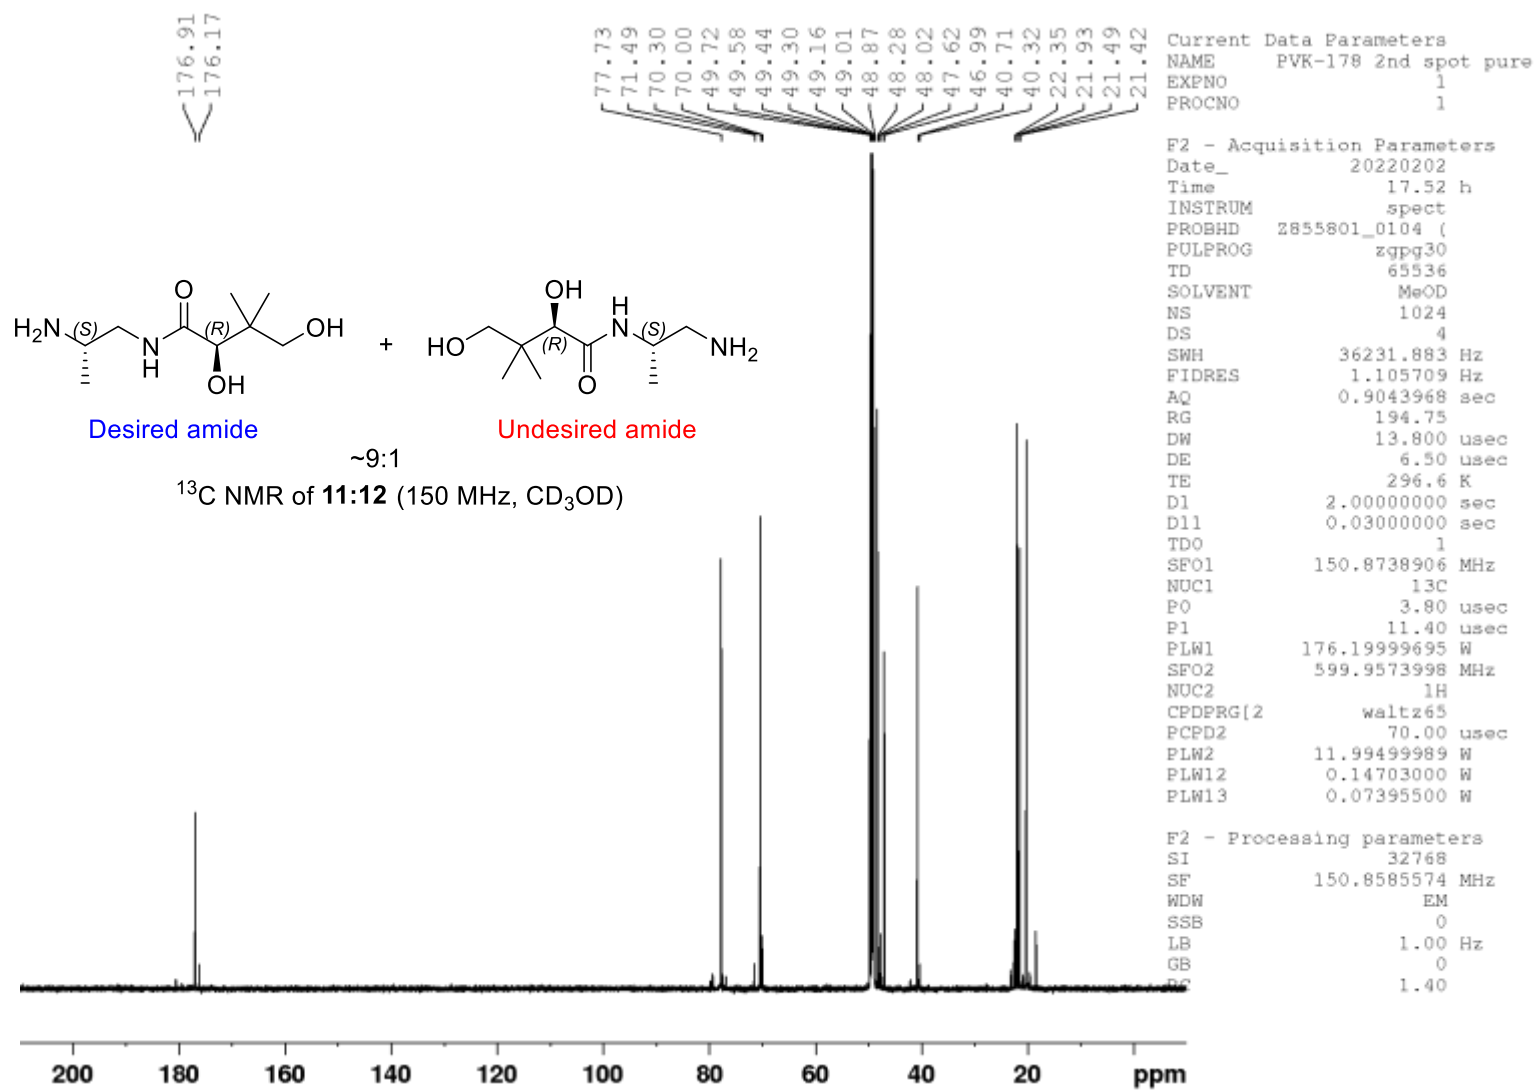

Fig S2.  $^{13}\text{C}$ NMR of compound **11** in  $\text{CD}_3\text{OD}$

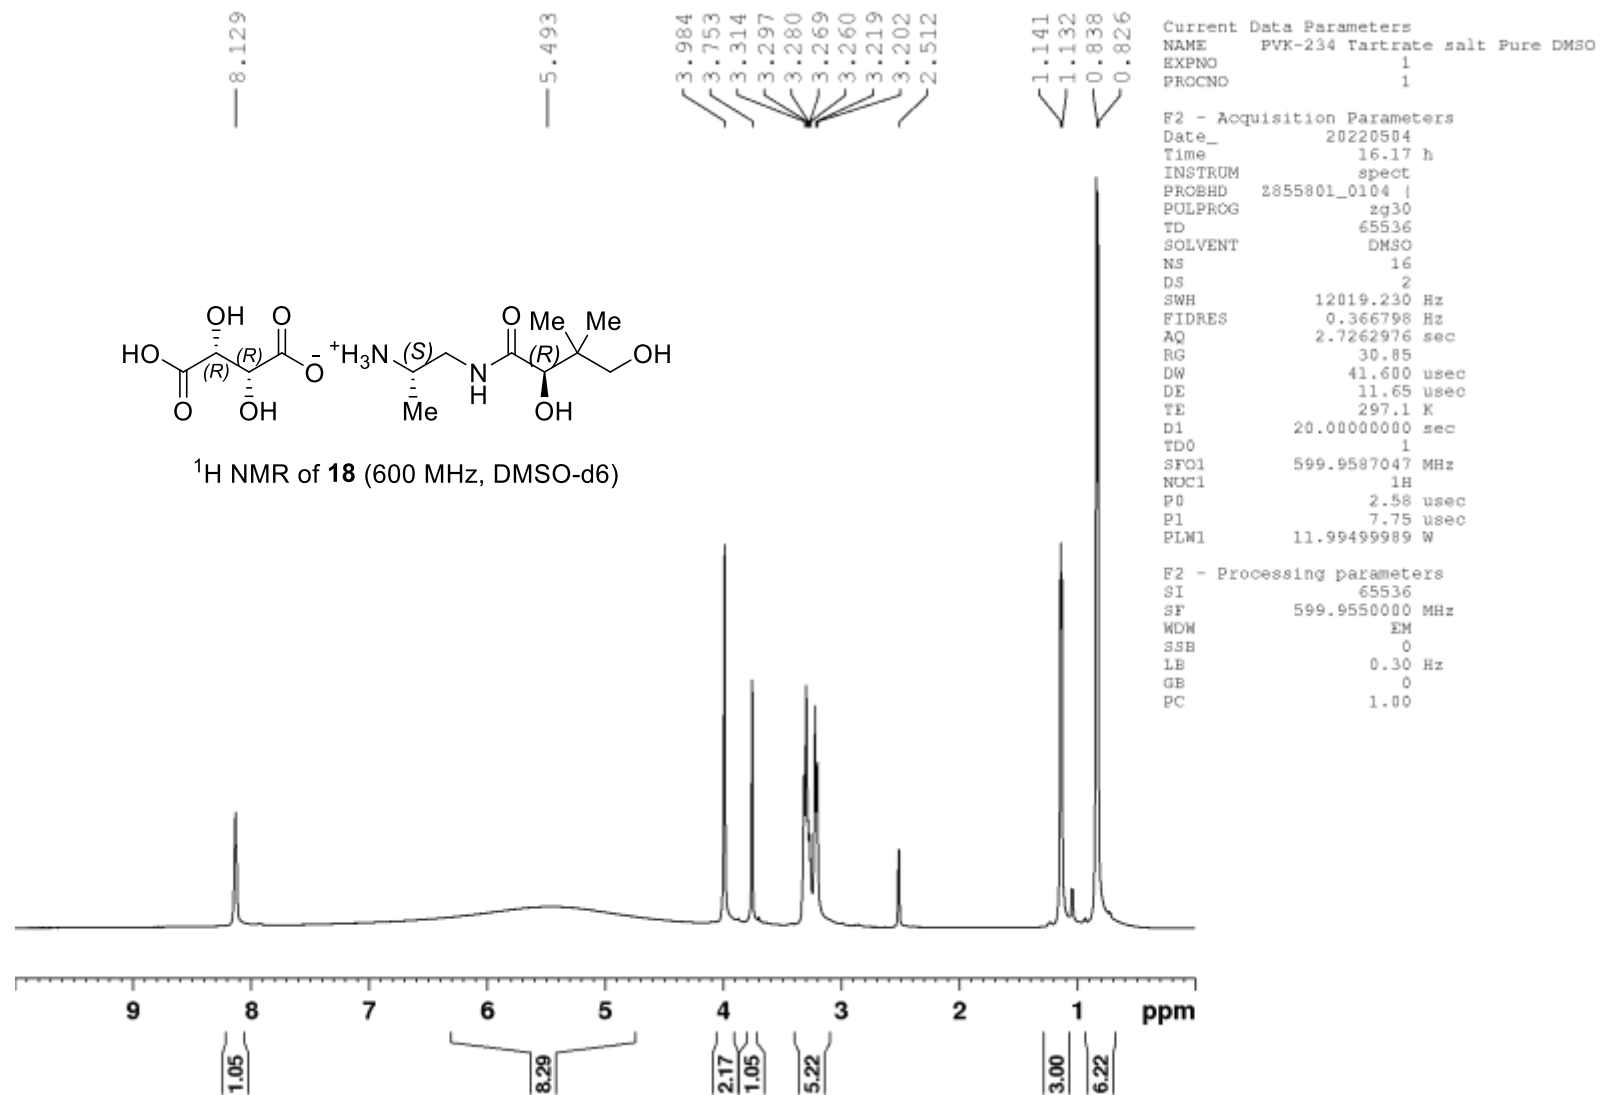

Fig S3. <sup>1</sup>HNMR of compound **18** in DMSO-d<sub>6</sub>

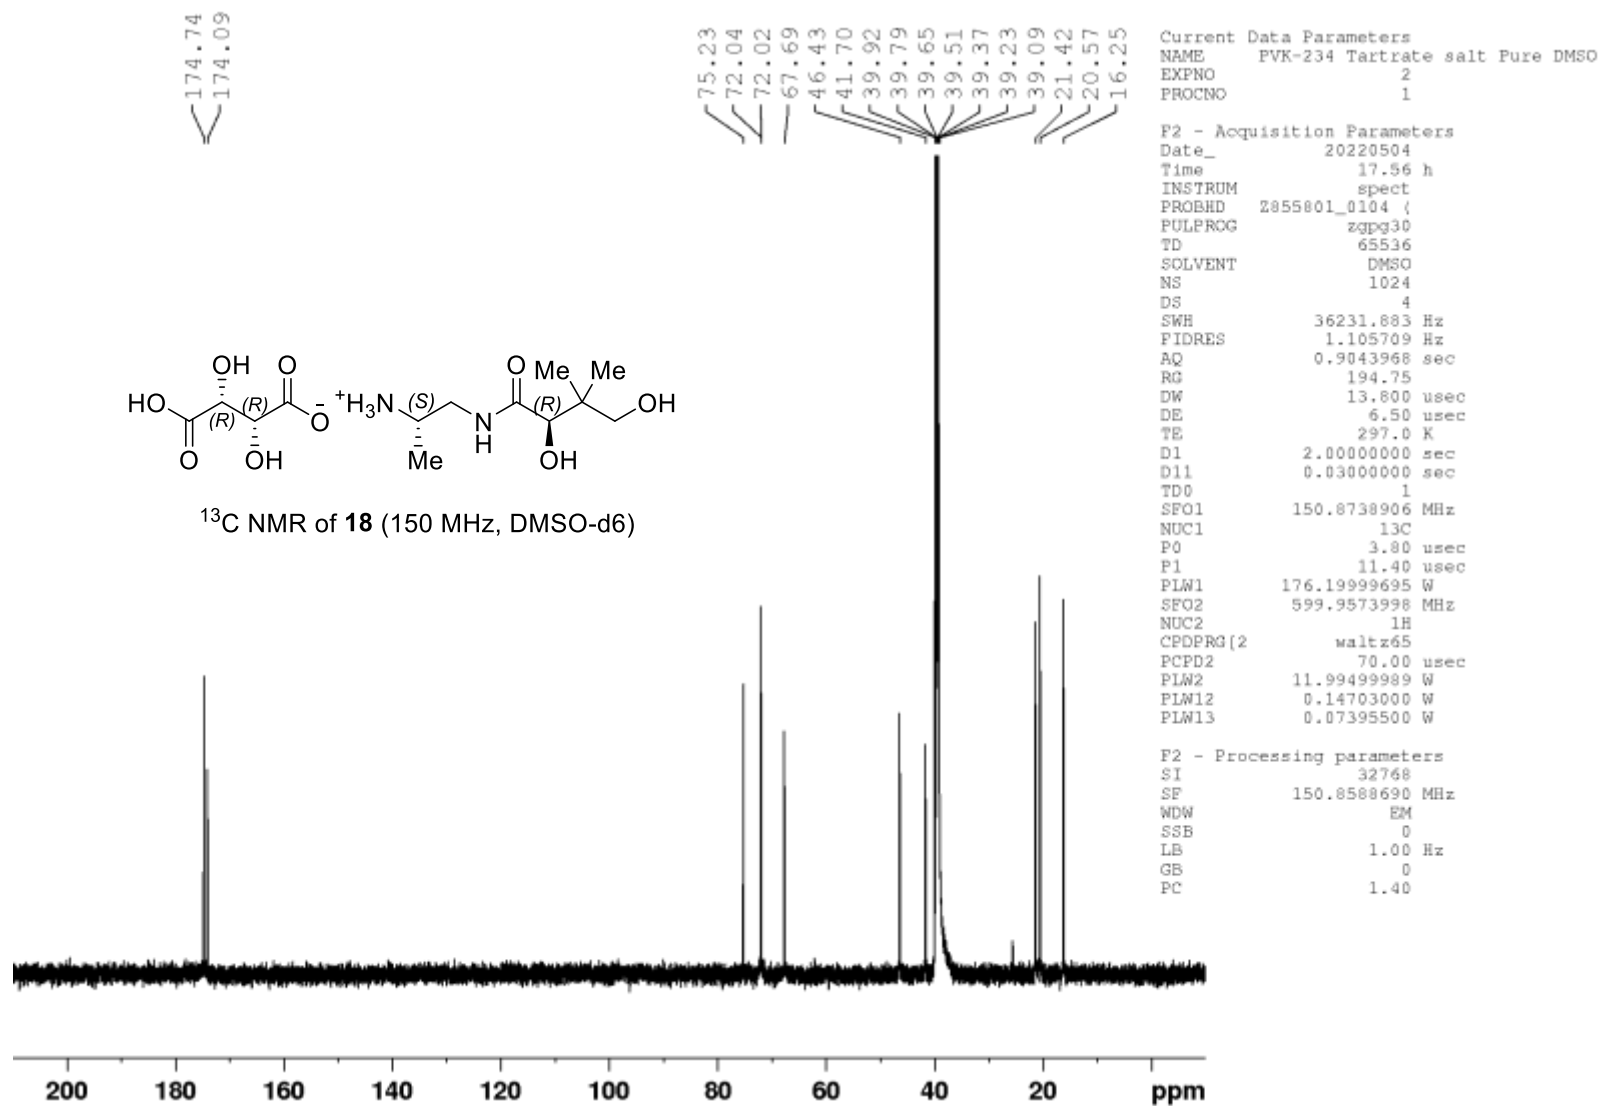

Fig S4. <sup>13</sup>CNMR of compound **18** in DMSO-d<sub>6</sub>

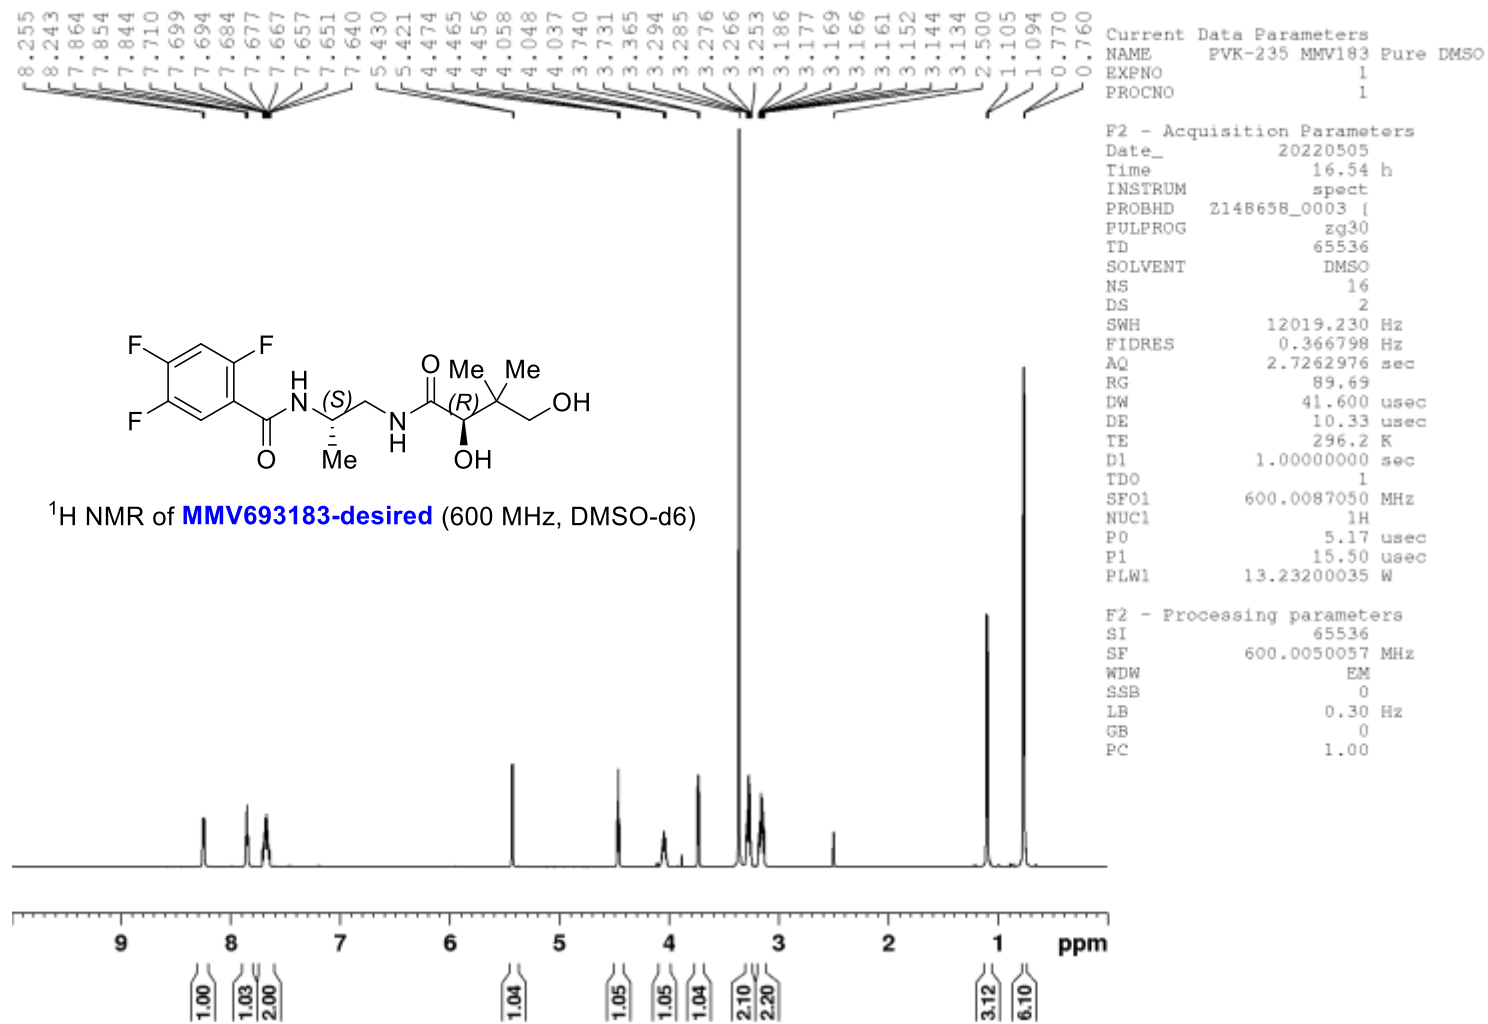

Fig S5. <sup>1</sup>H NMR data of MMV693183 (desired isomer) in DMSO-d<sub>6</sub>

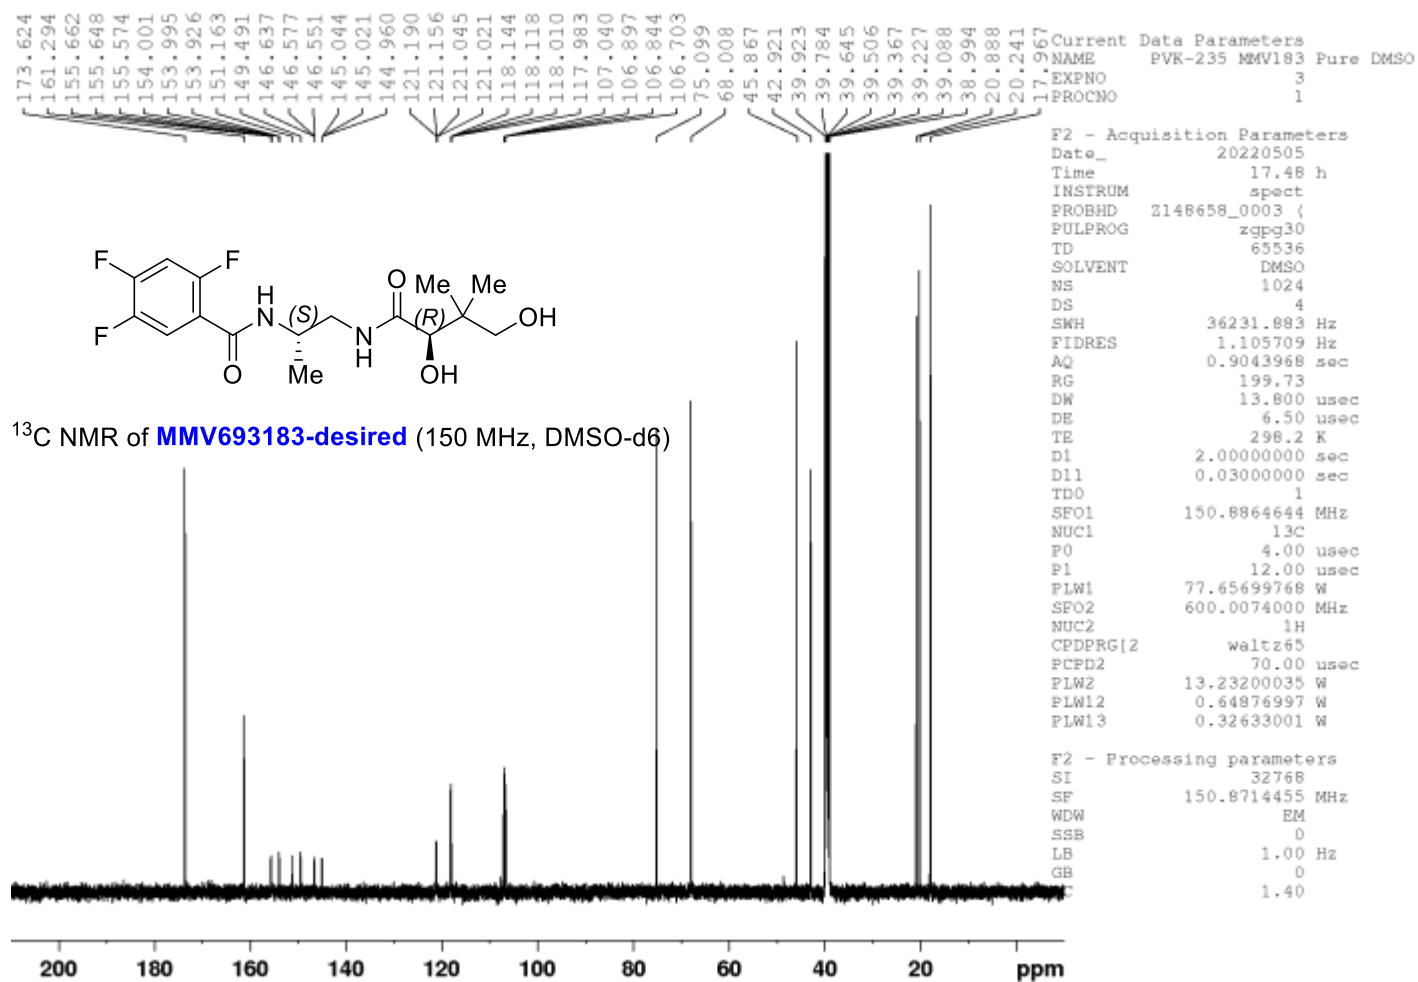

Fig S6. <sup>13</sup>CNMR data of MMV693183 (desired isomer) in DMSO-d<sub>6</sub>



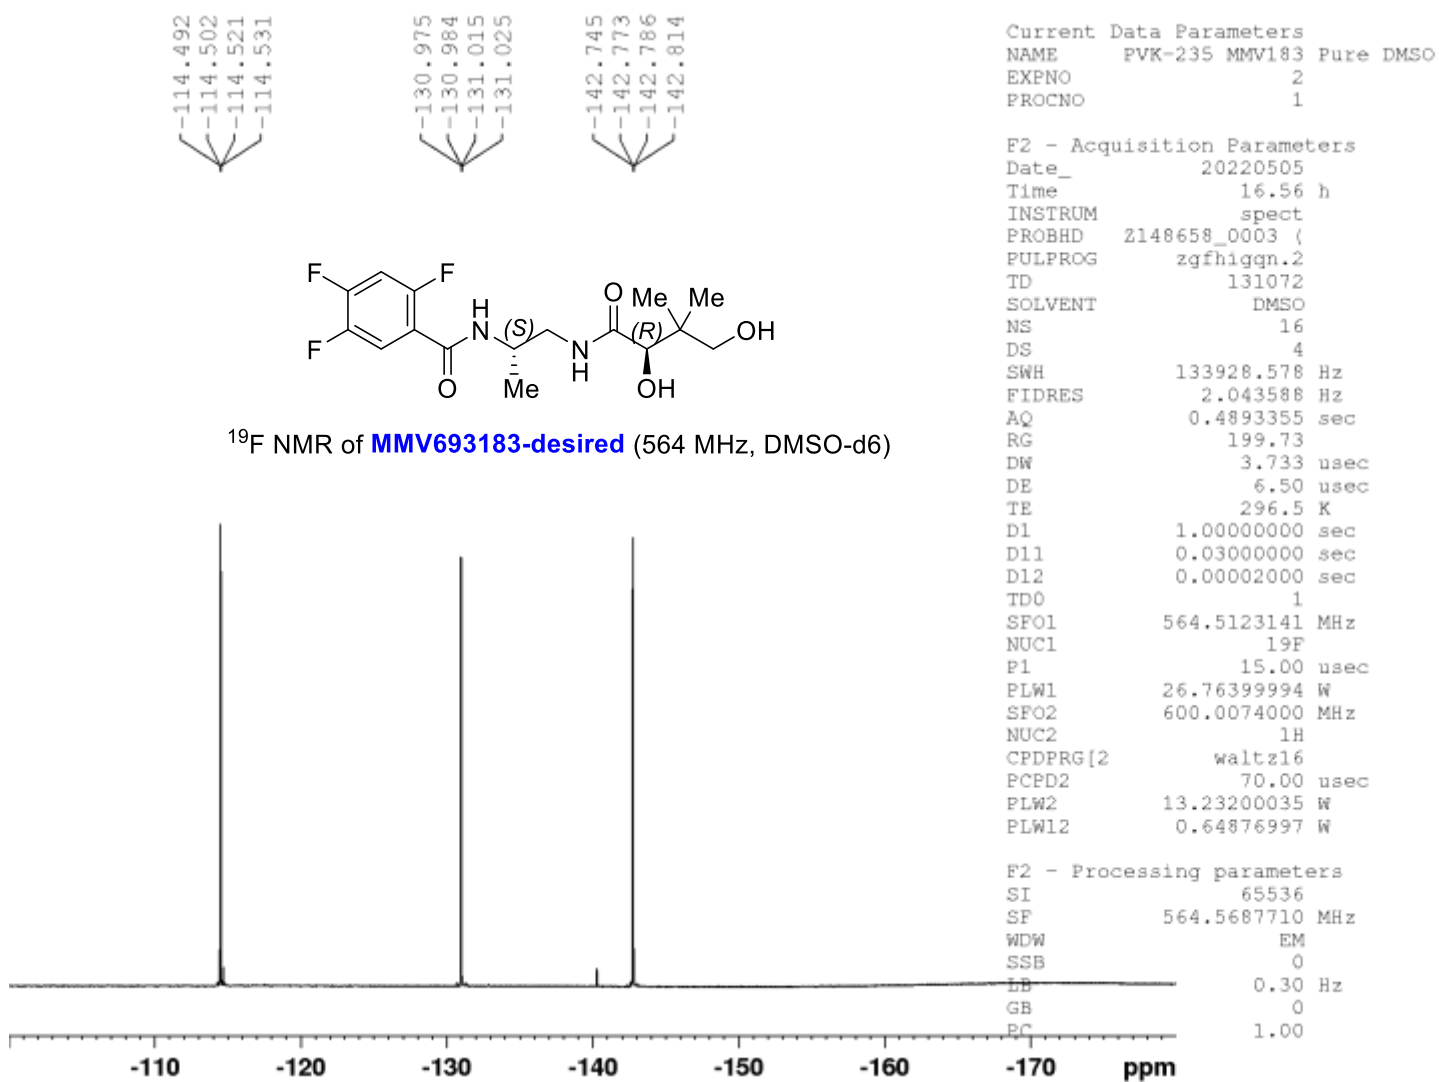

Fig S7.  $^{19}\text{F}$ NMR data of MMV693183 (desired isomer) in DMSO-d<sub>6</sub>

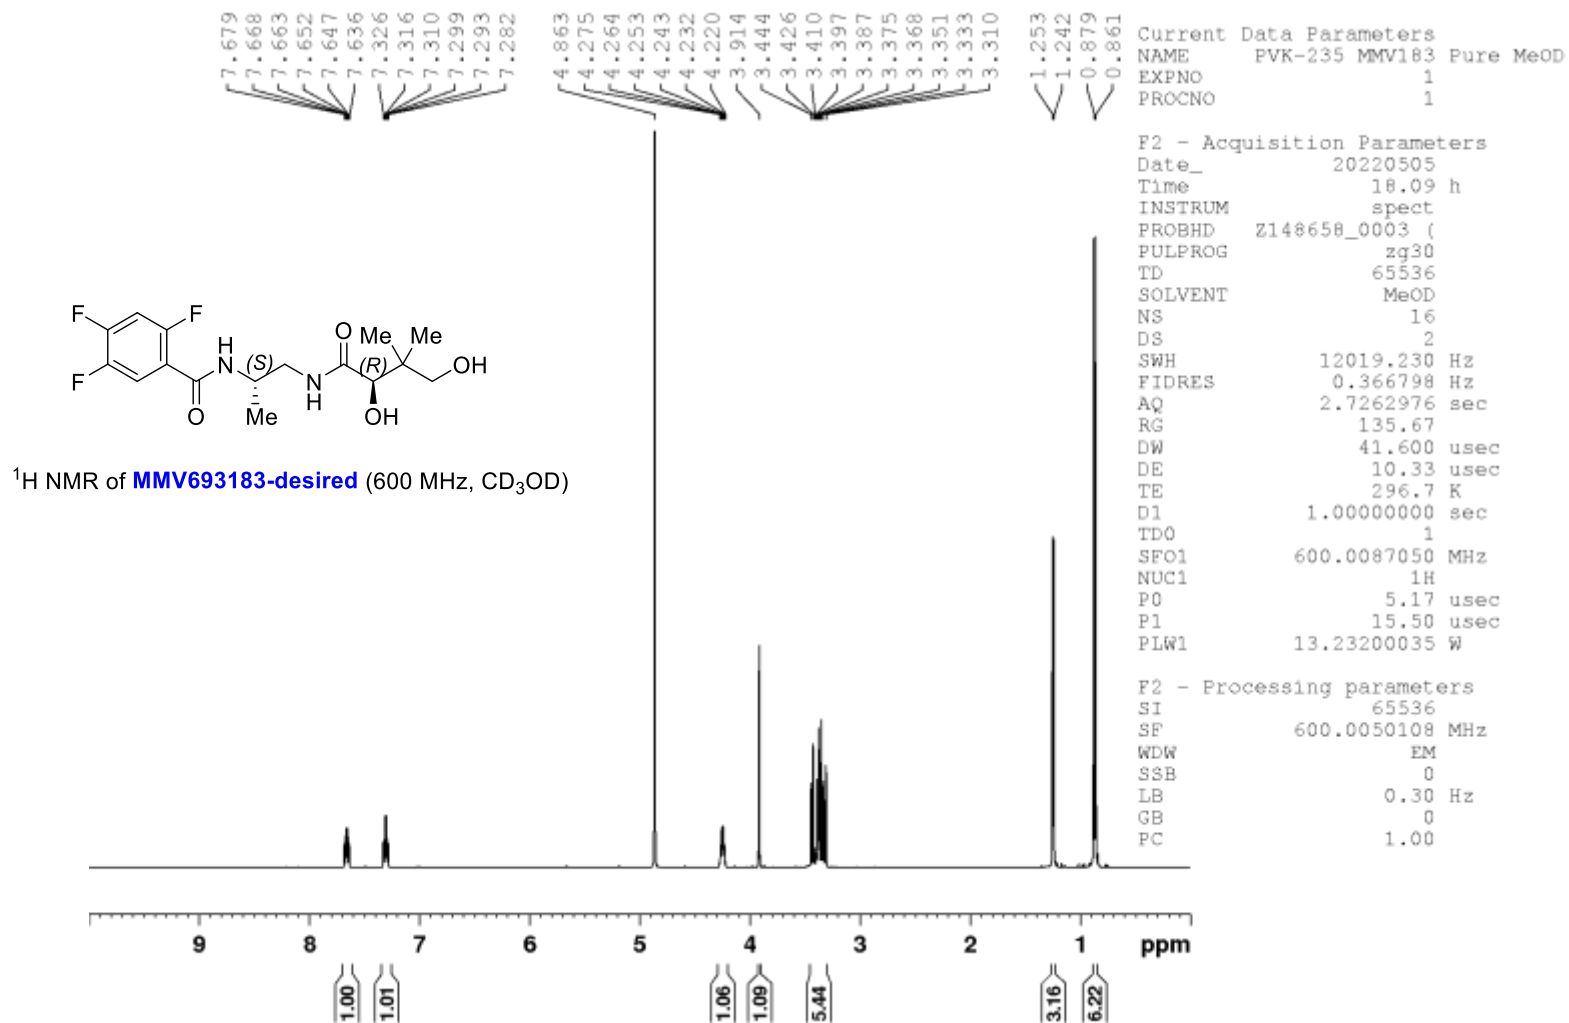

Fig S8. <sup>1</sup>H NMR data of MMV693183 (desired isomer) in CD<sub>3</sub>OD

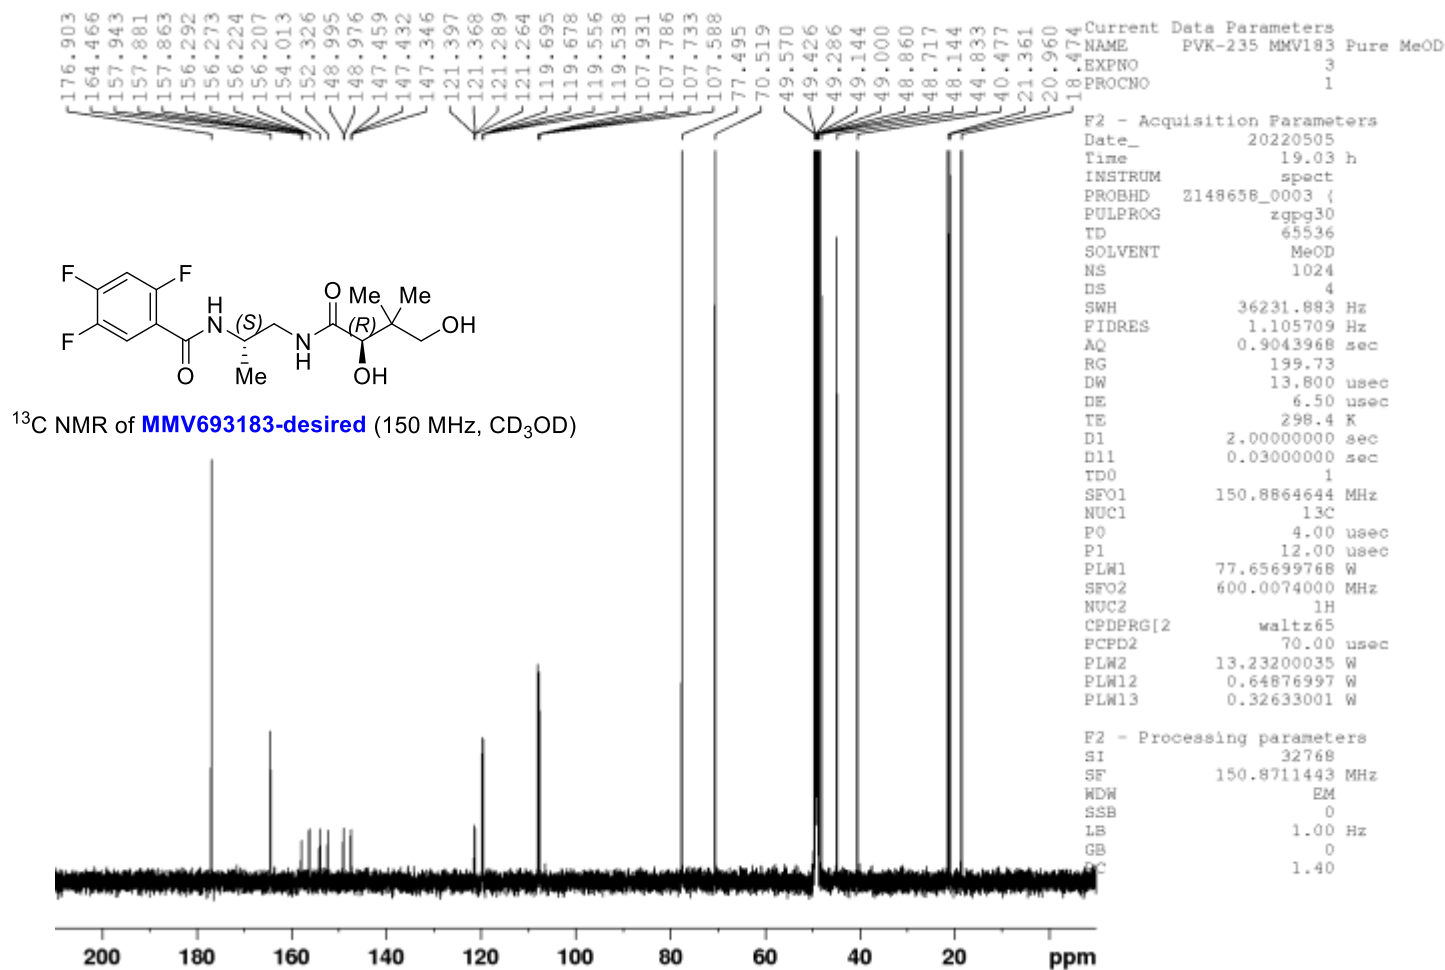

**Fig S9.** <sup>13</sup>CNMR data of MMV693183 (desired isomer) in CD<sub>3</sub>OD

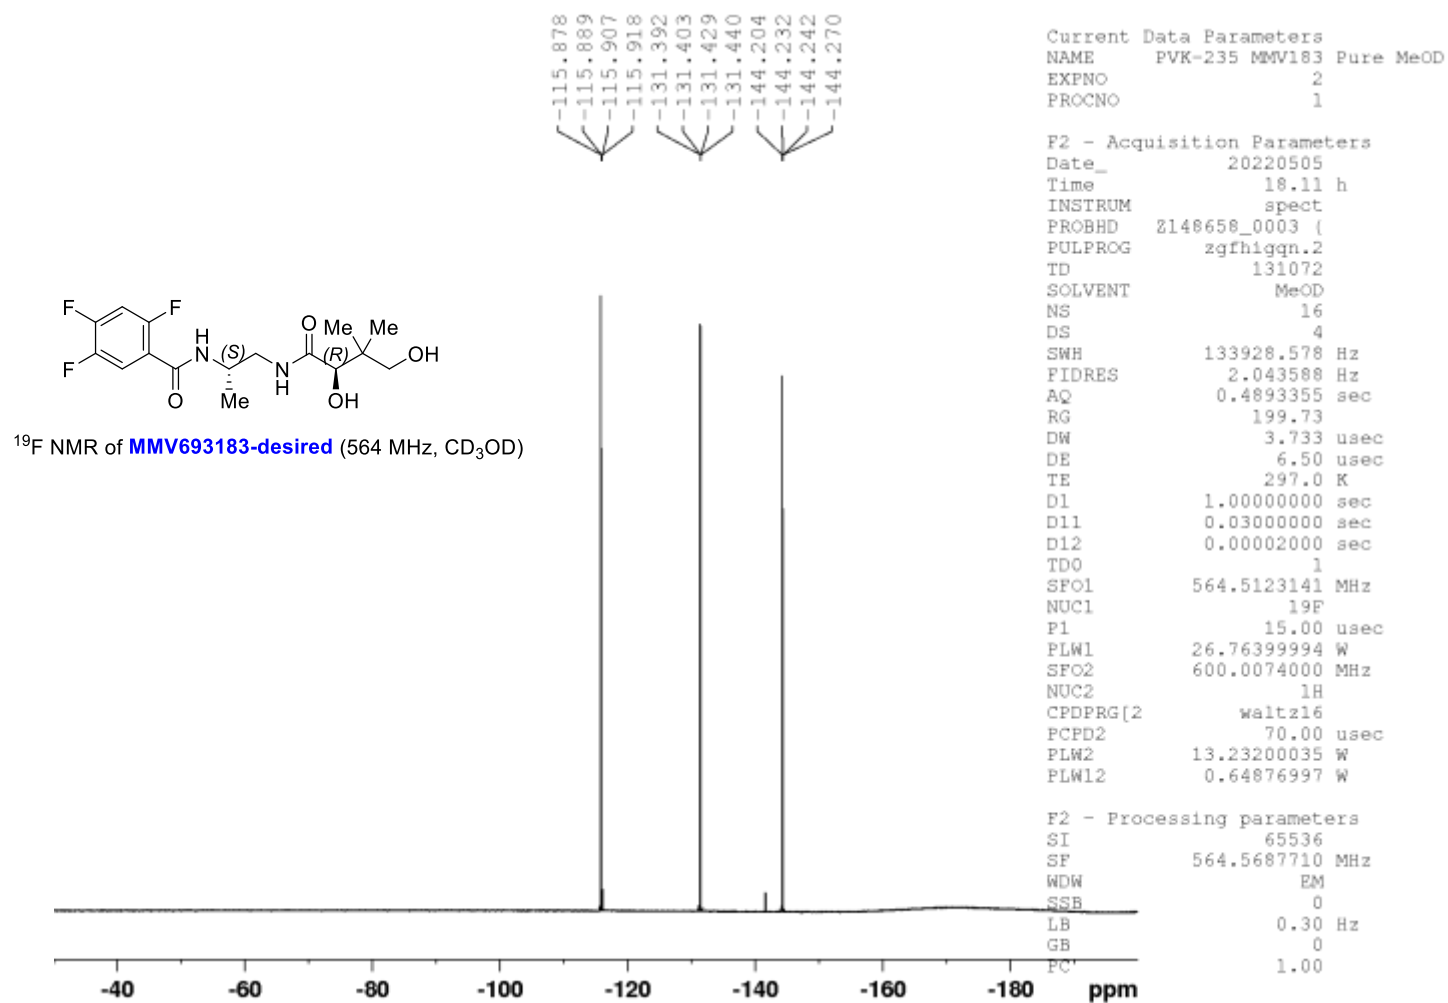

Fig S10. <sup>19</sup>F NMR data of MMV693183 (desired isomer) in CD<sub>3</sub>OD

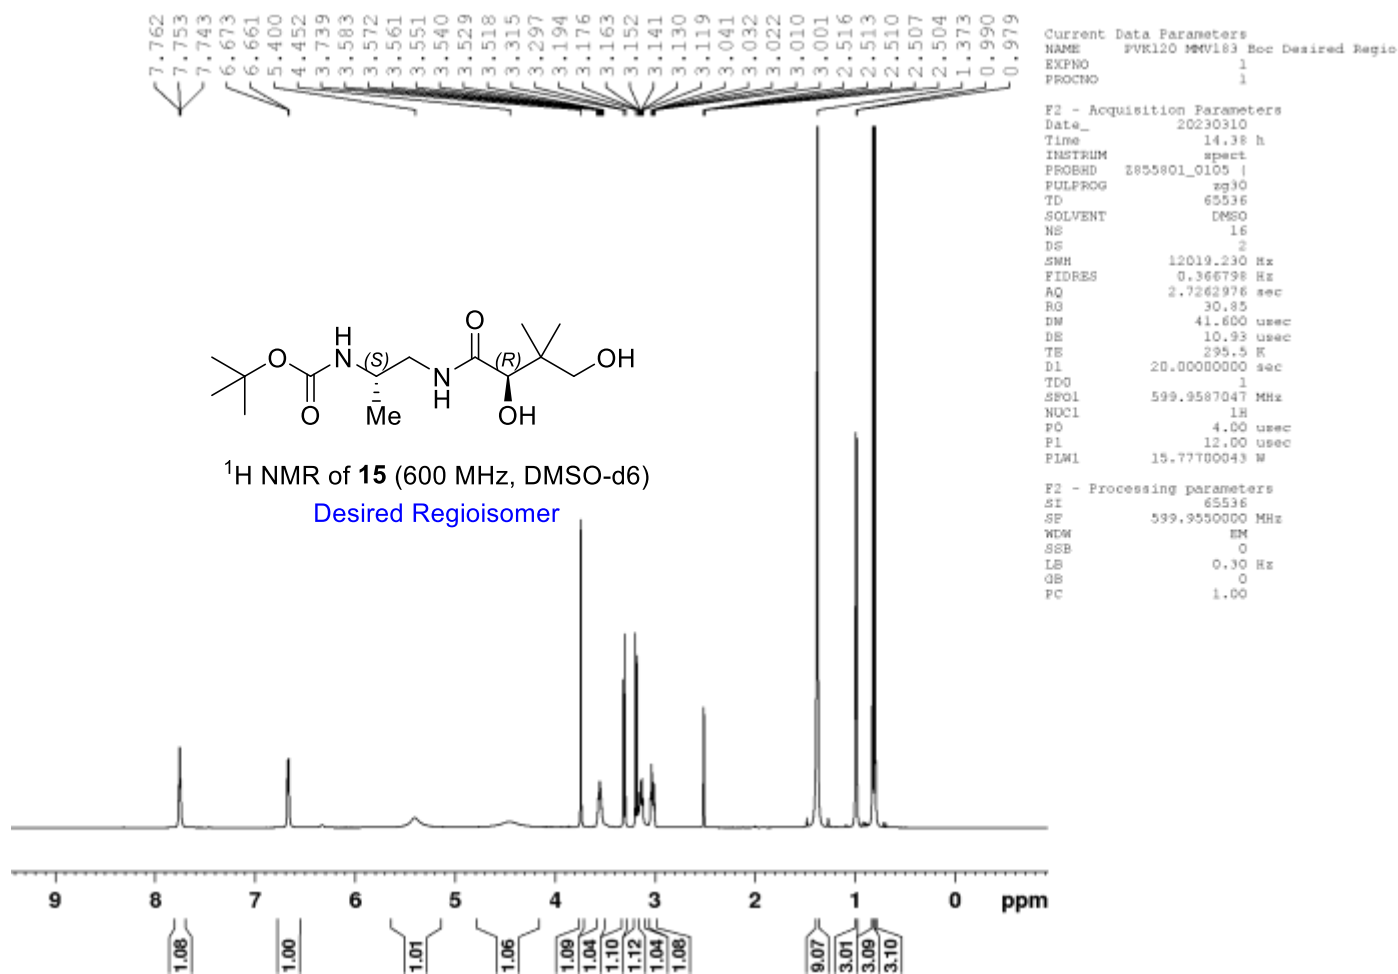

Fig S11. <sup>1</sup>H NMR data of compound **15** in DMSO-d<sub>6</sub>

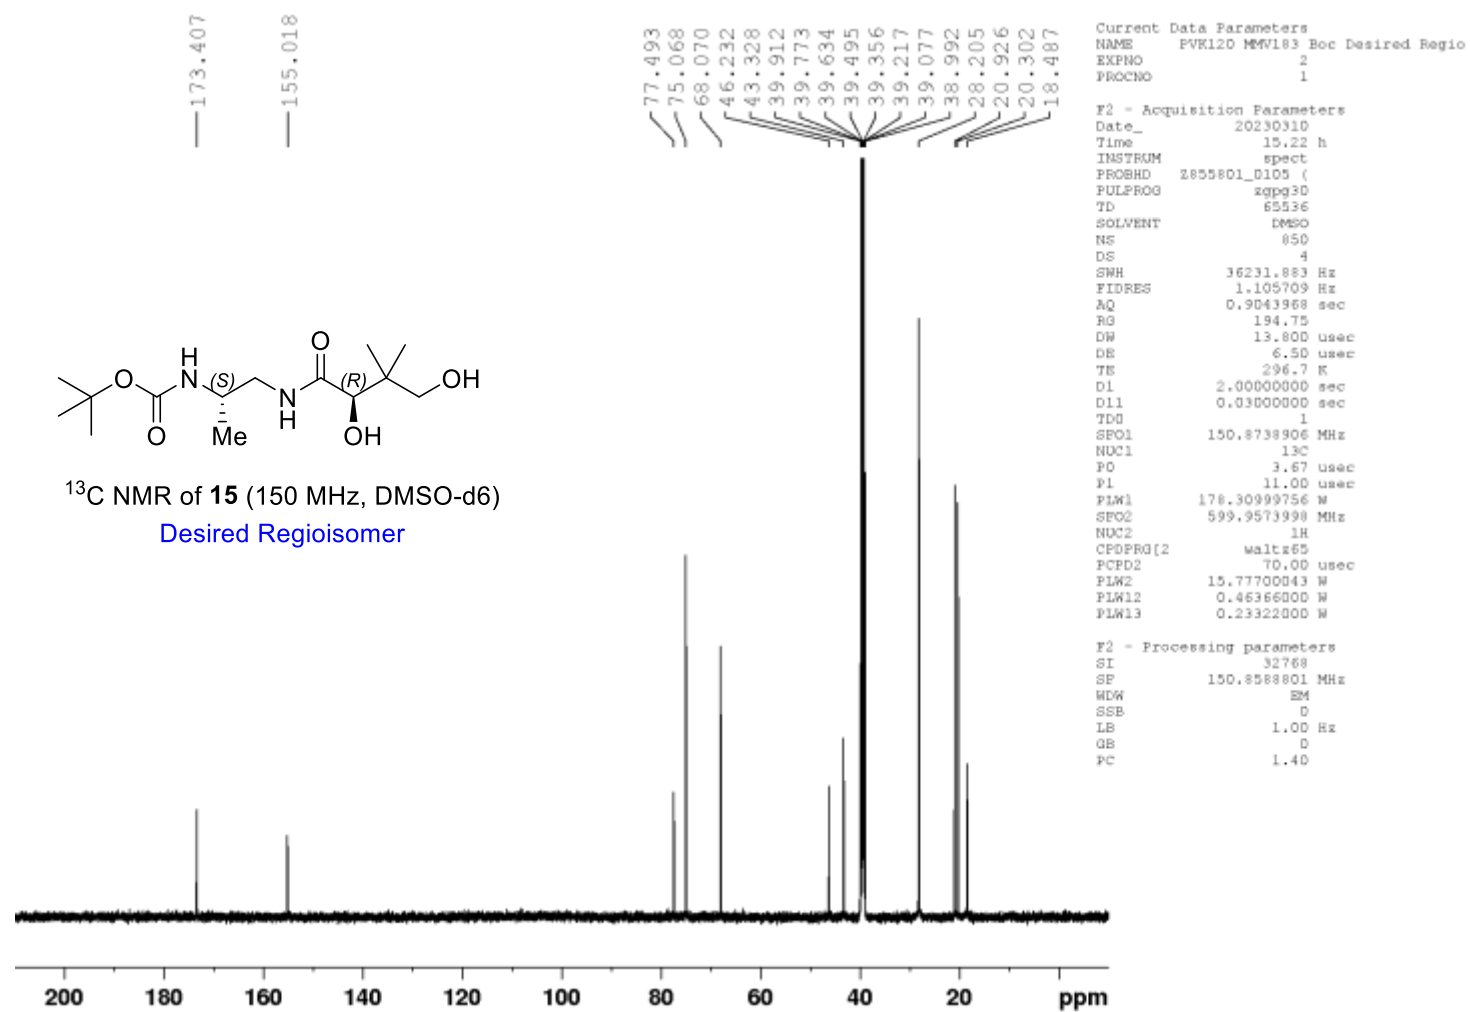

Fig S12. <sup>13</sup>CNMR data of compound **15** in DMSO-d<sub>6</sub>

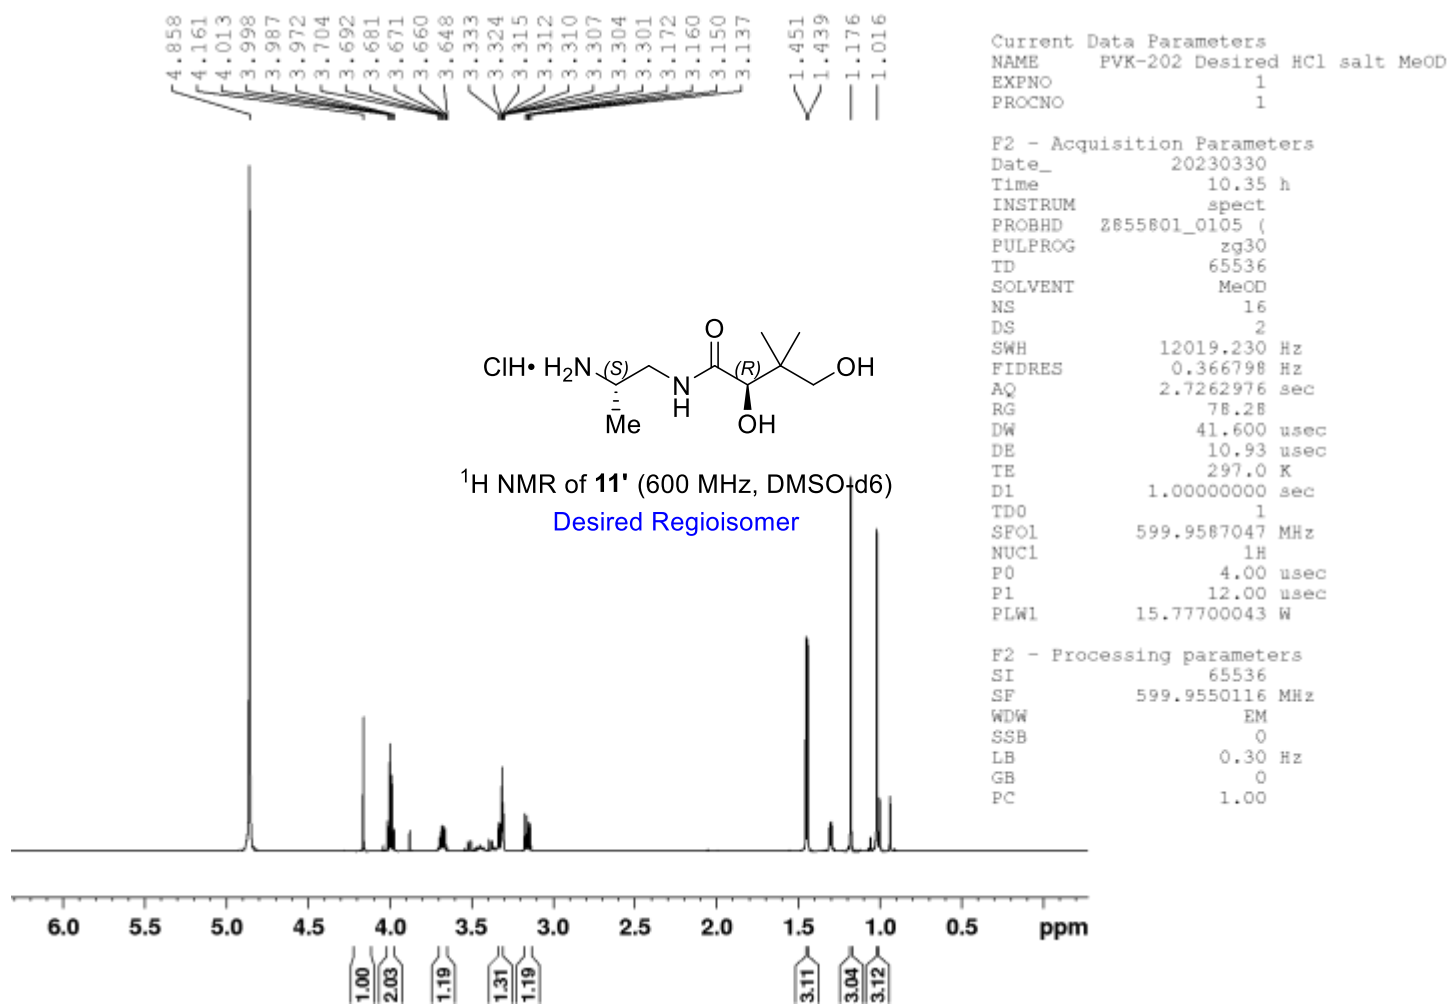

Fig S13. <sup>1</sup>H NMR data of compound 11' in DMSO-d<sub>6</sub>

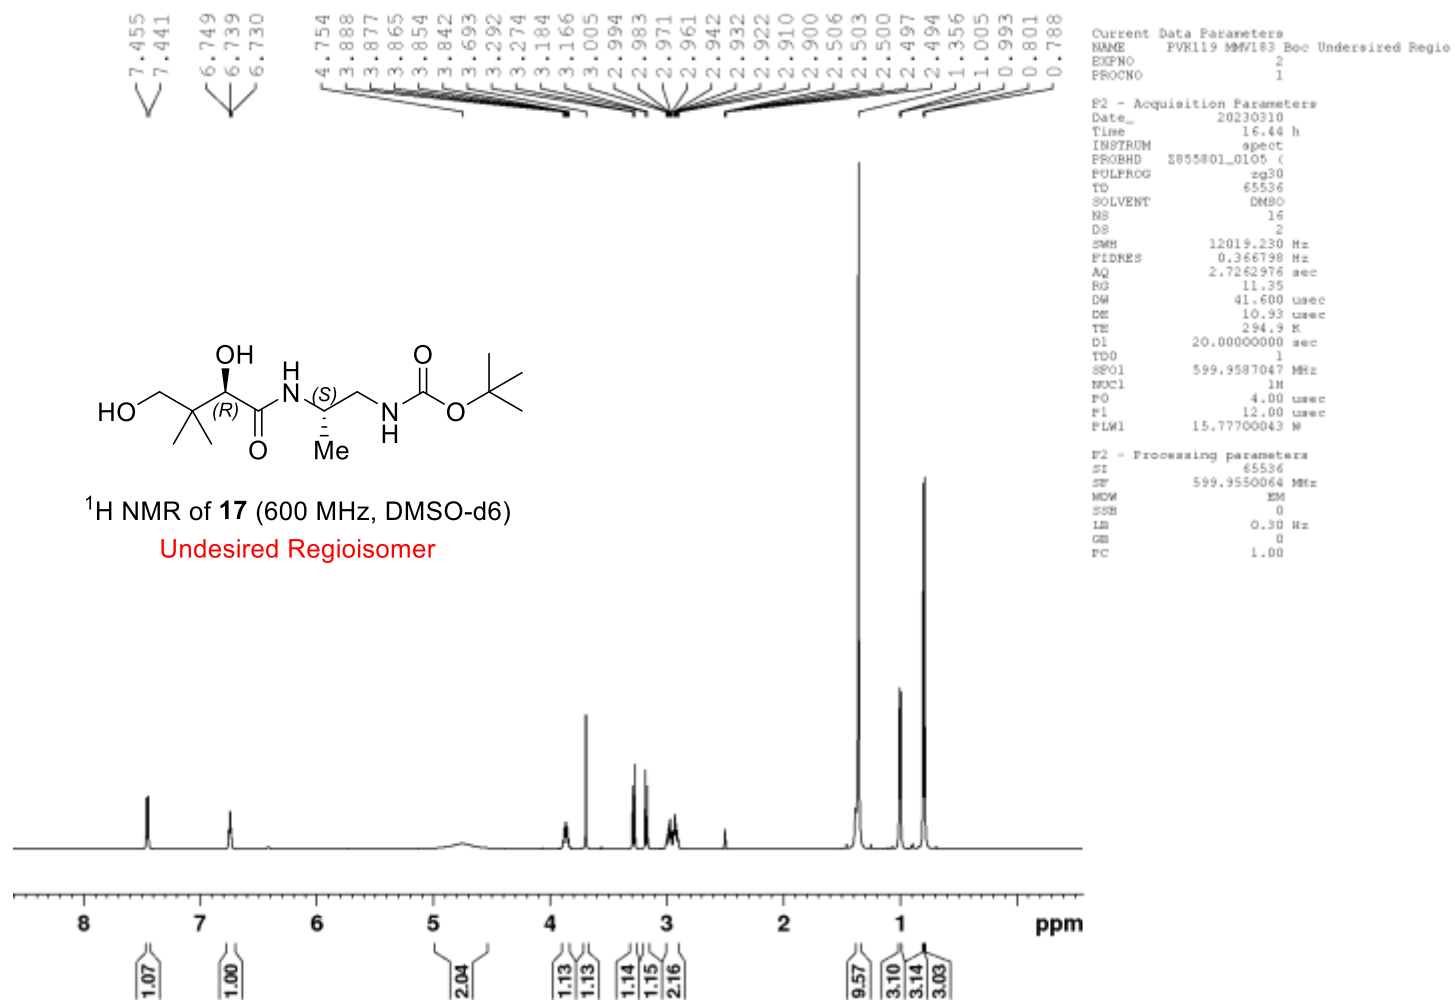

Fig S14.  $^1\text{H}$ NMR data of compound **17** in DMSO-d<sub>6</sub>



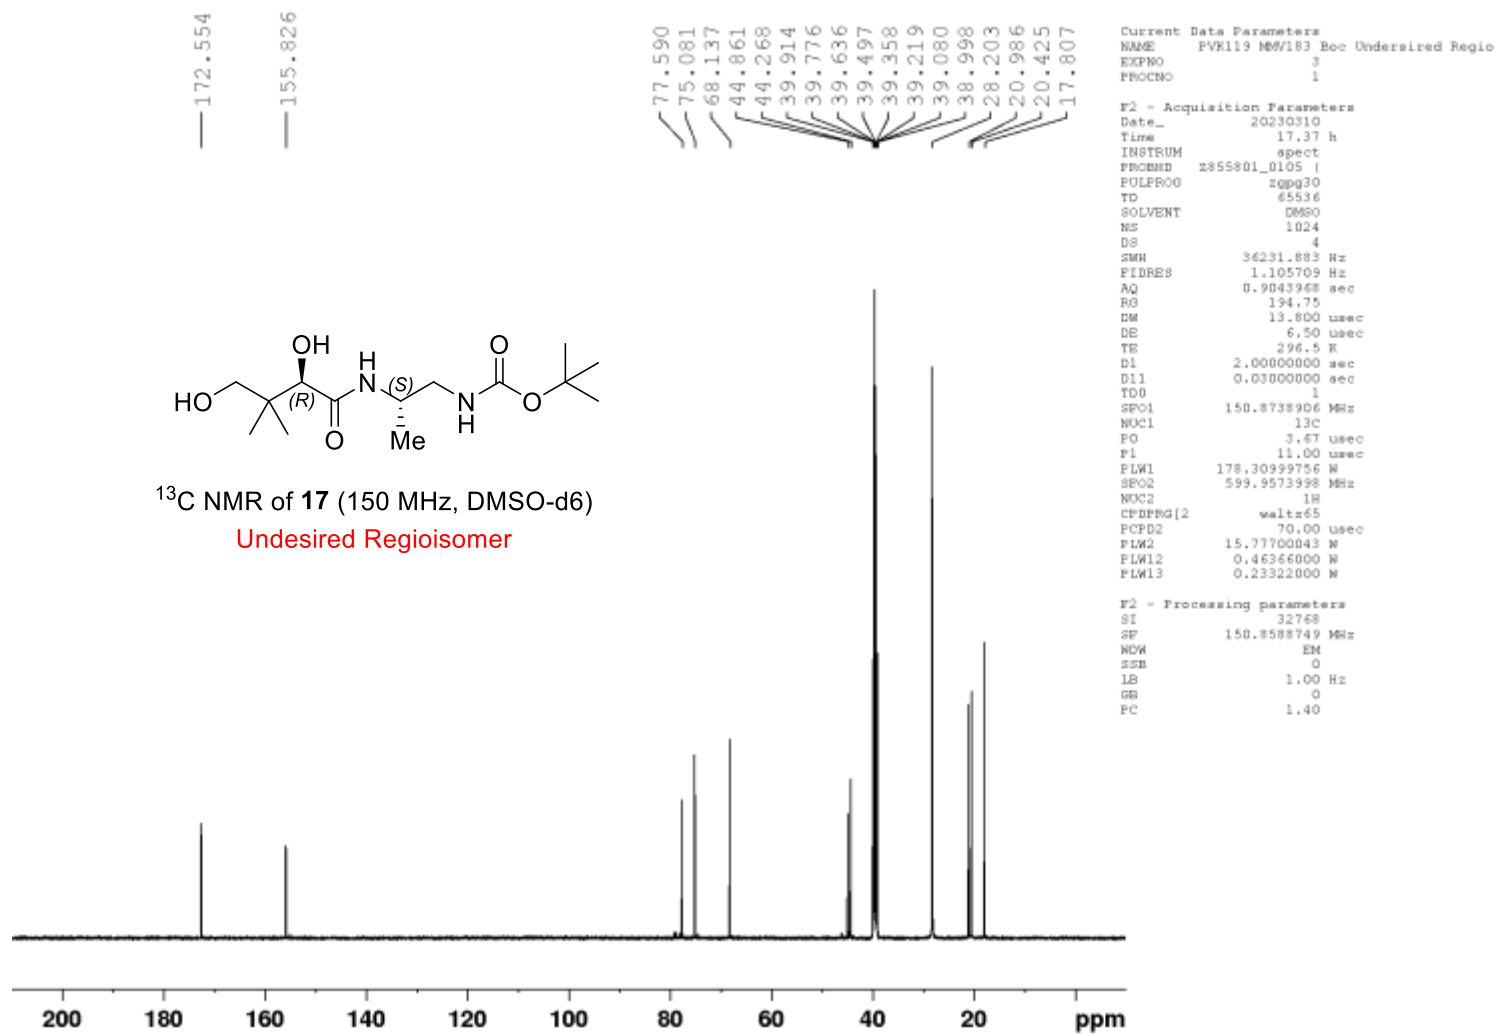

Fig S15. <sup>13</sup>CNMR data of compound **17** in DMSO-d<sub>6</sub>

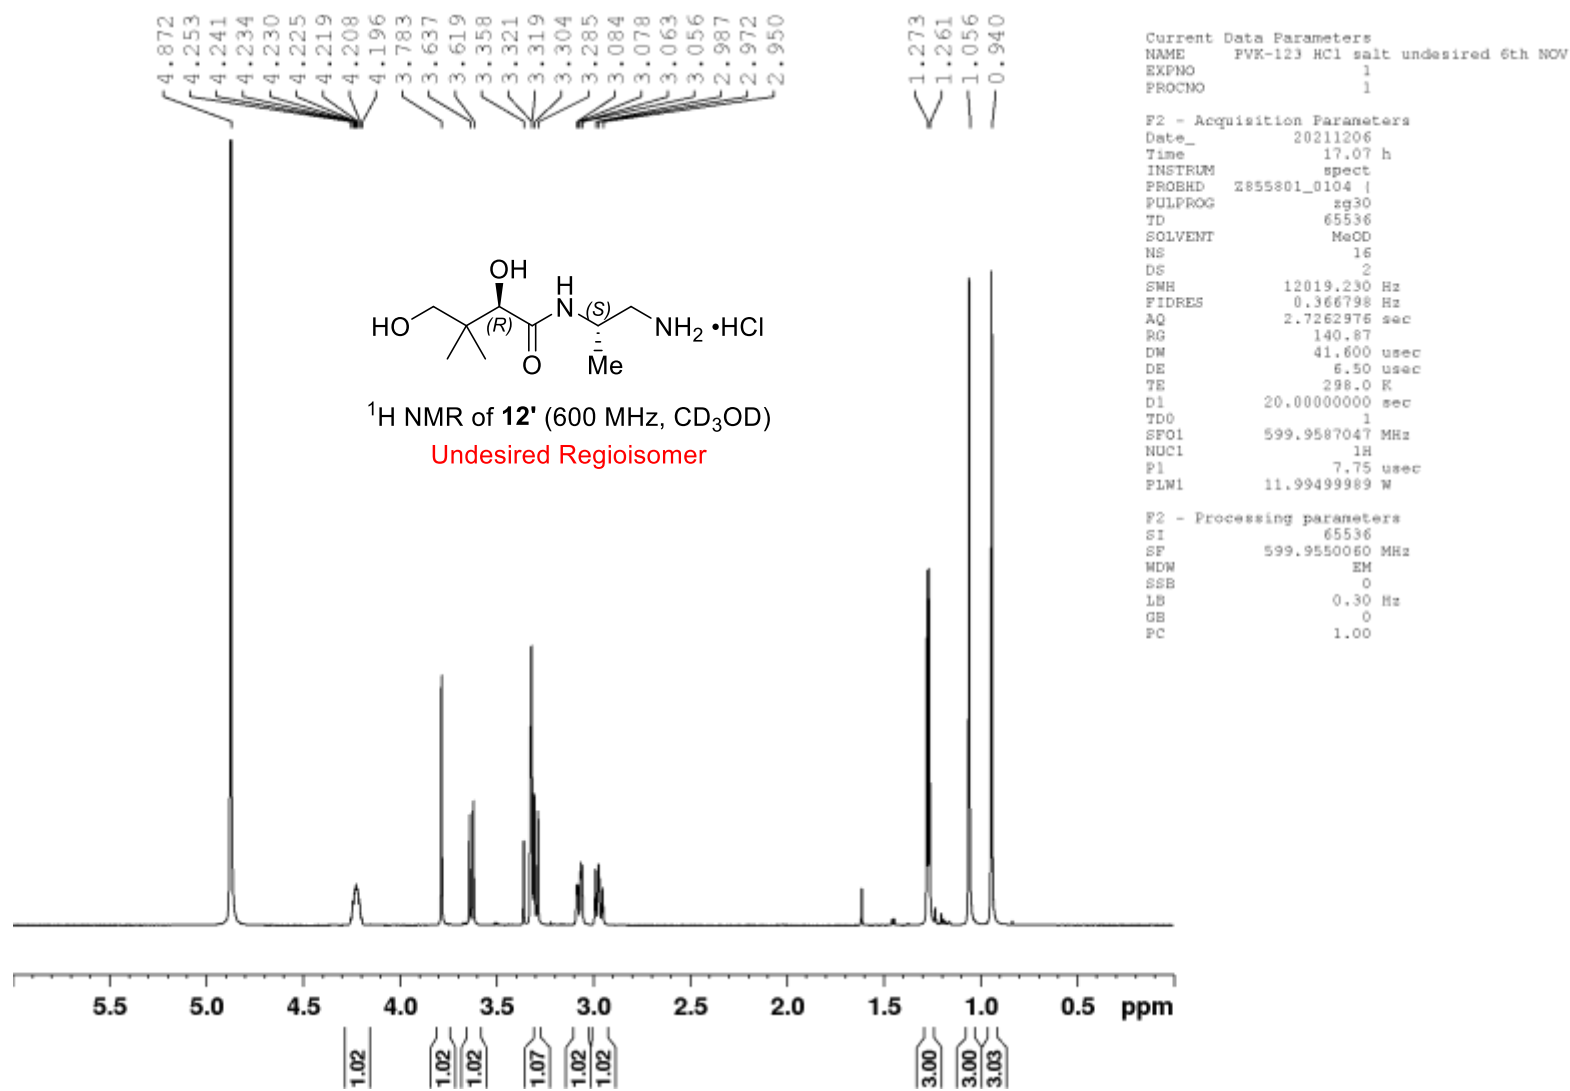

Fig S16. <sup>1</sup>H NMR data of compound **12'** in CD<sub>3</sub>OD

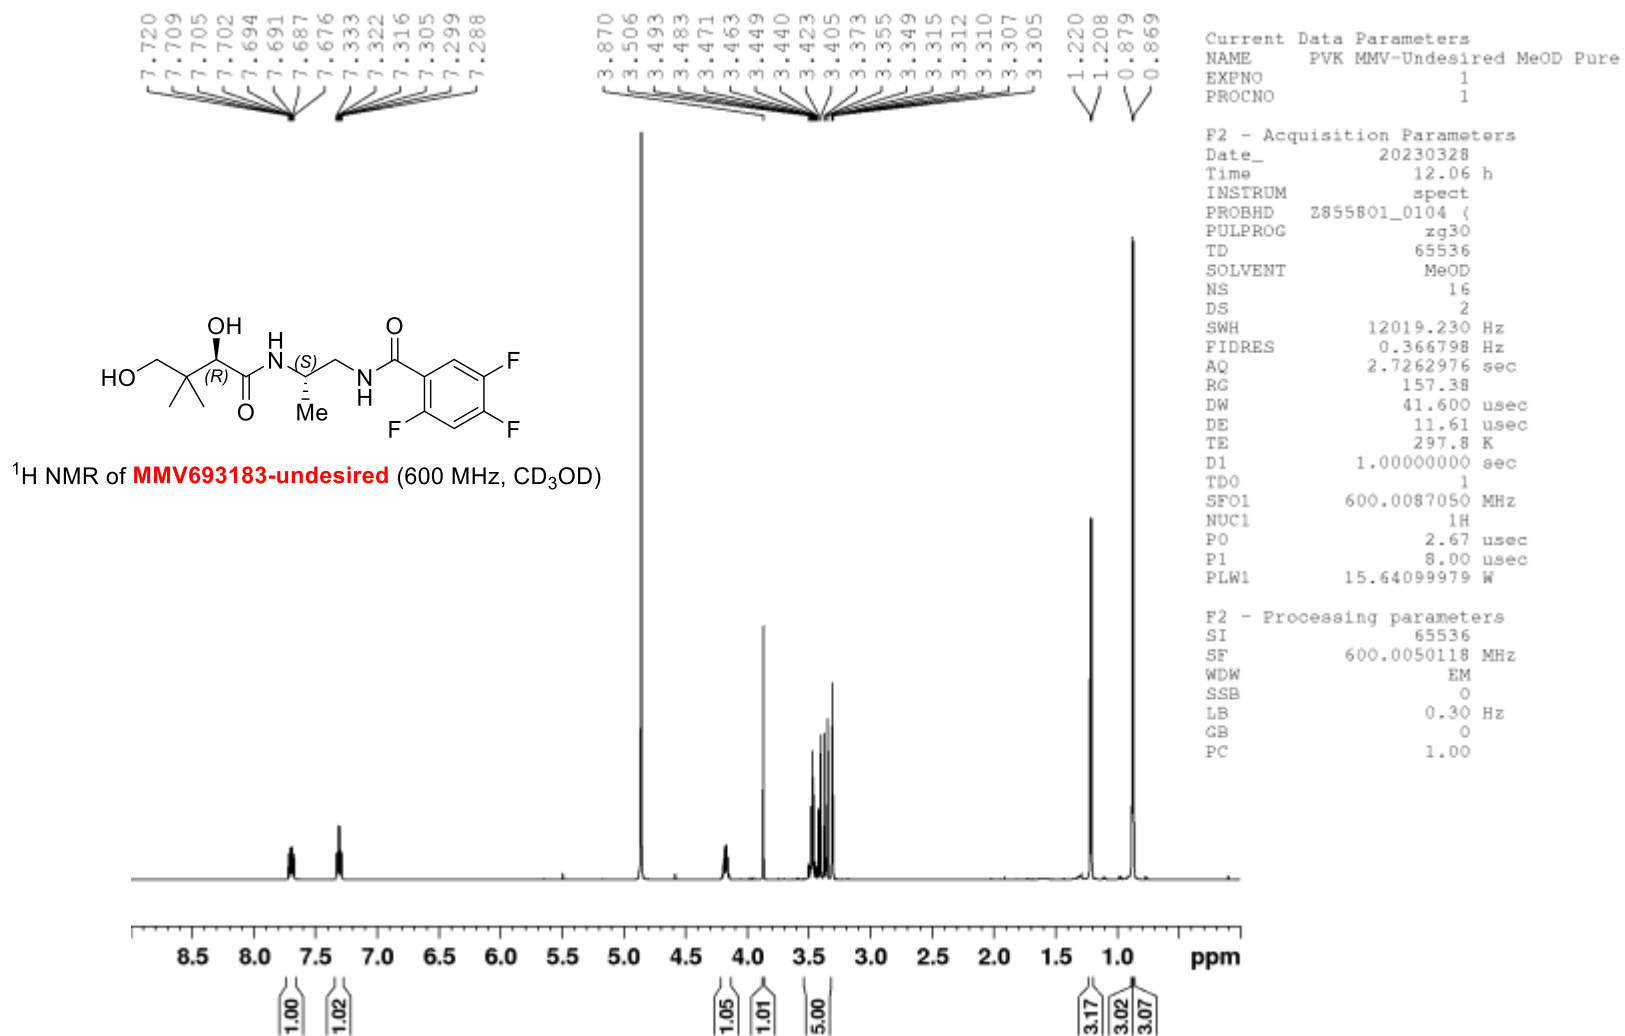

Fig S17. <sup>1</sup>H NMR data of MMV693183-undesired isomer in CD<sub>3</sub>OD

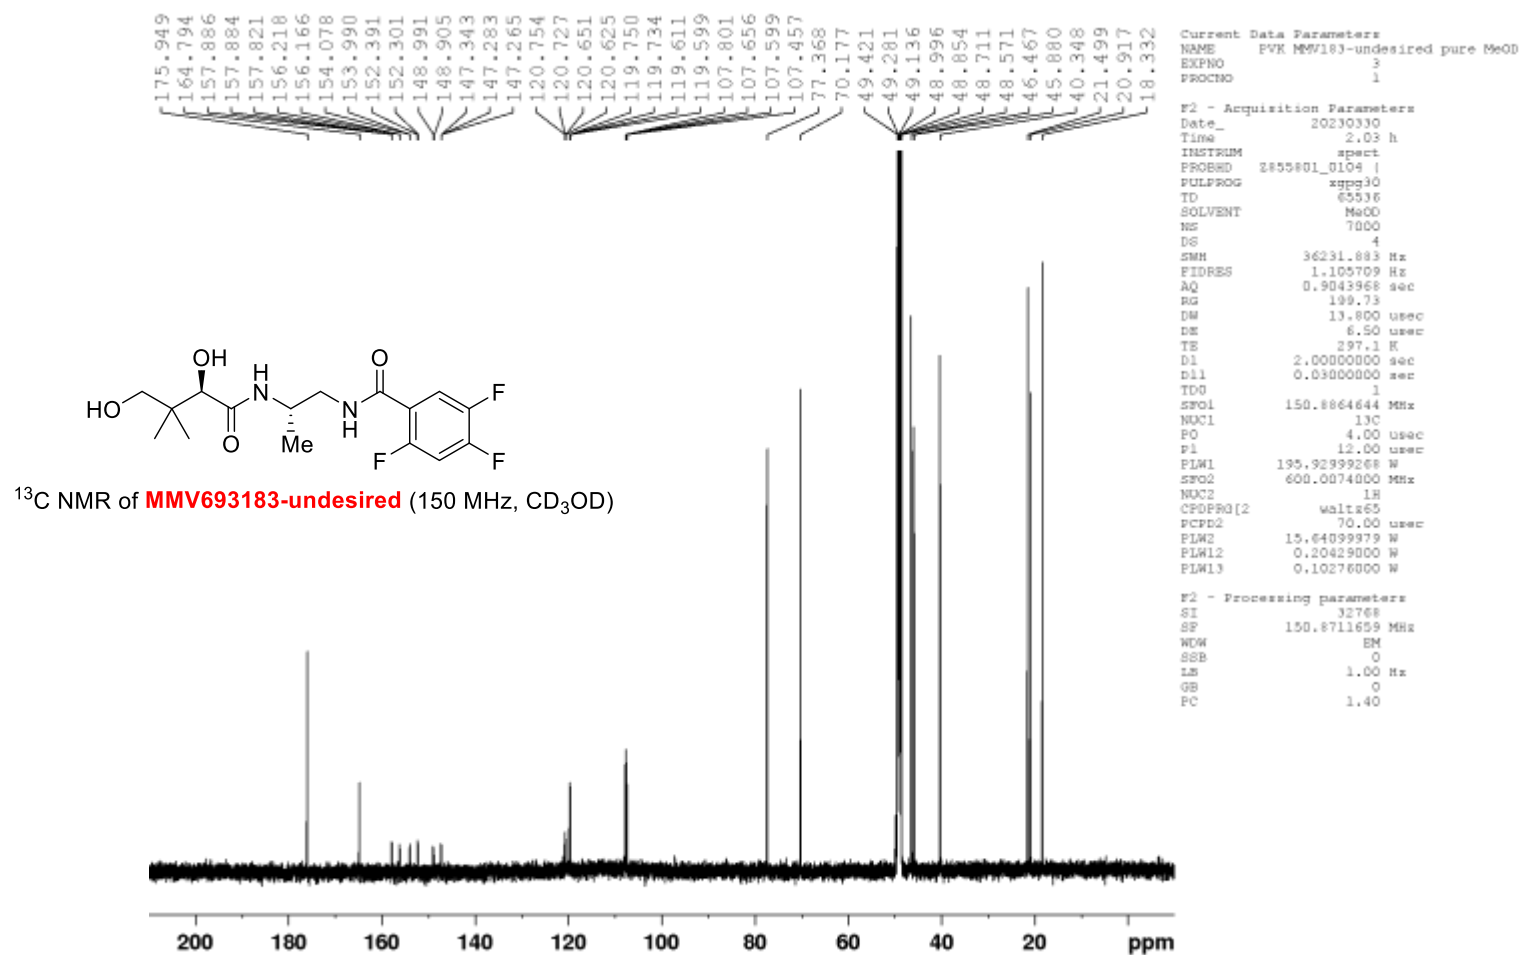

**Fig S18.** <sup>13</sup>CNMR data of MMV693183-undesired isomer in CD<sub>3</sub>OD

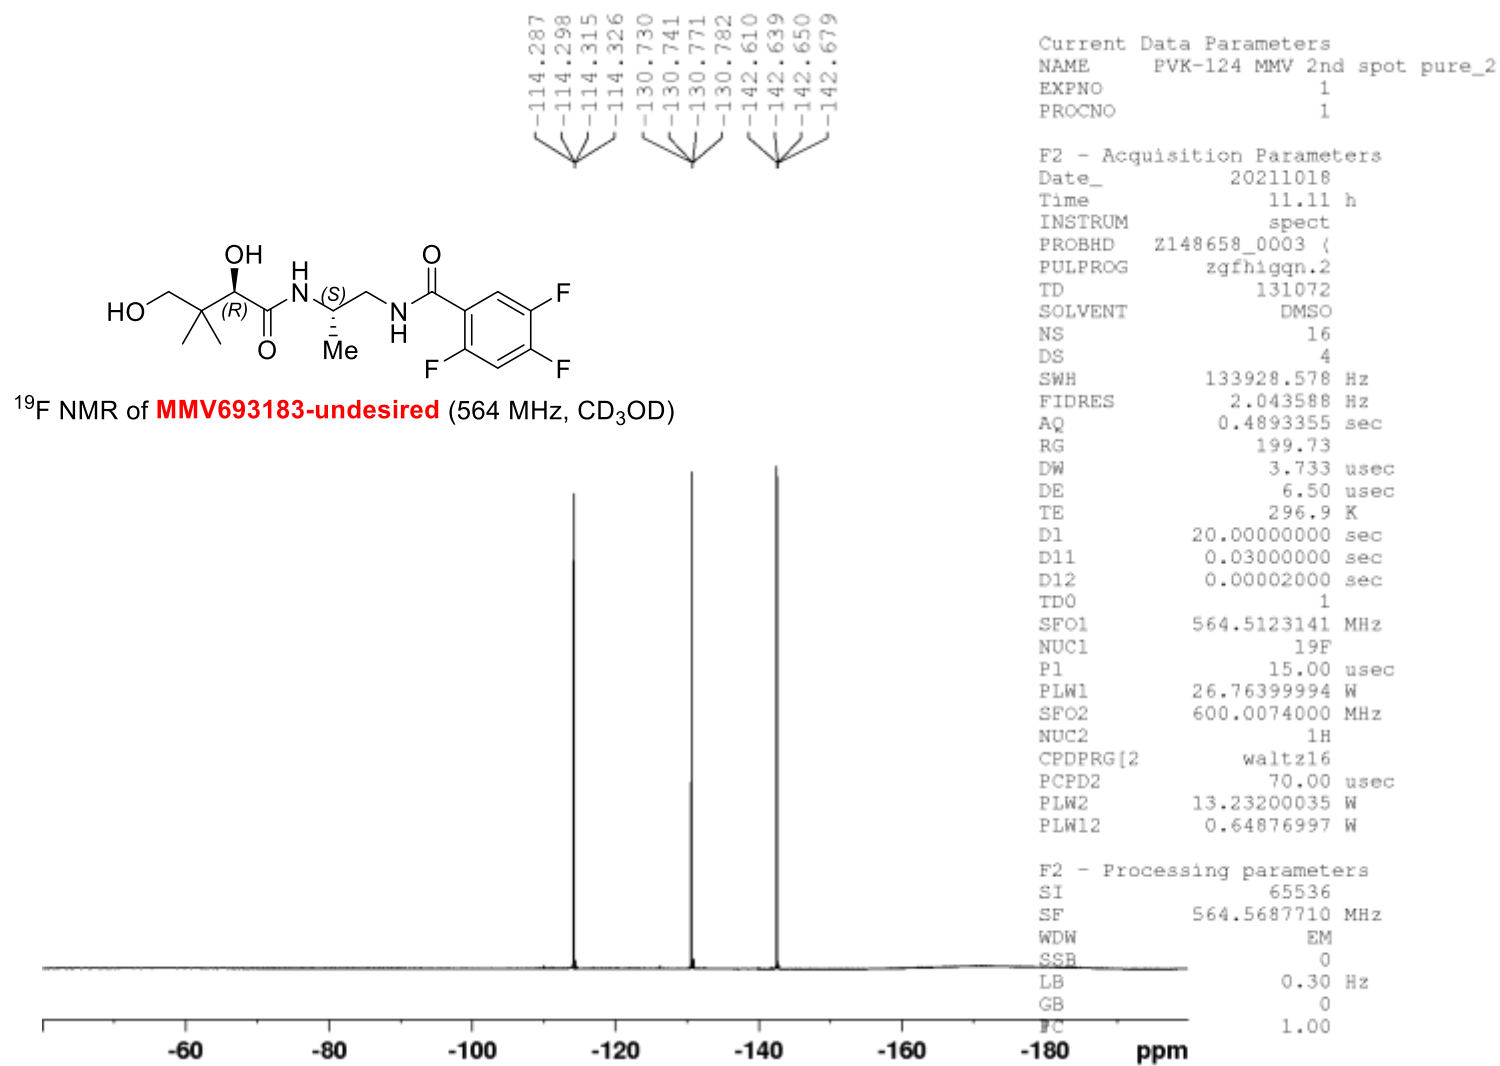

Fig S19. <sup>19</sup>F NMR data of MMV693183-undesired isomer in CD<sub>3</sub>OD

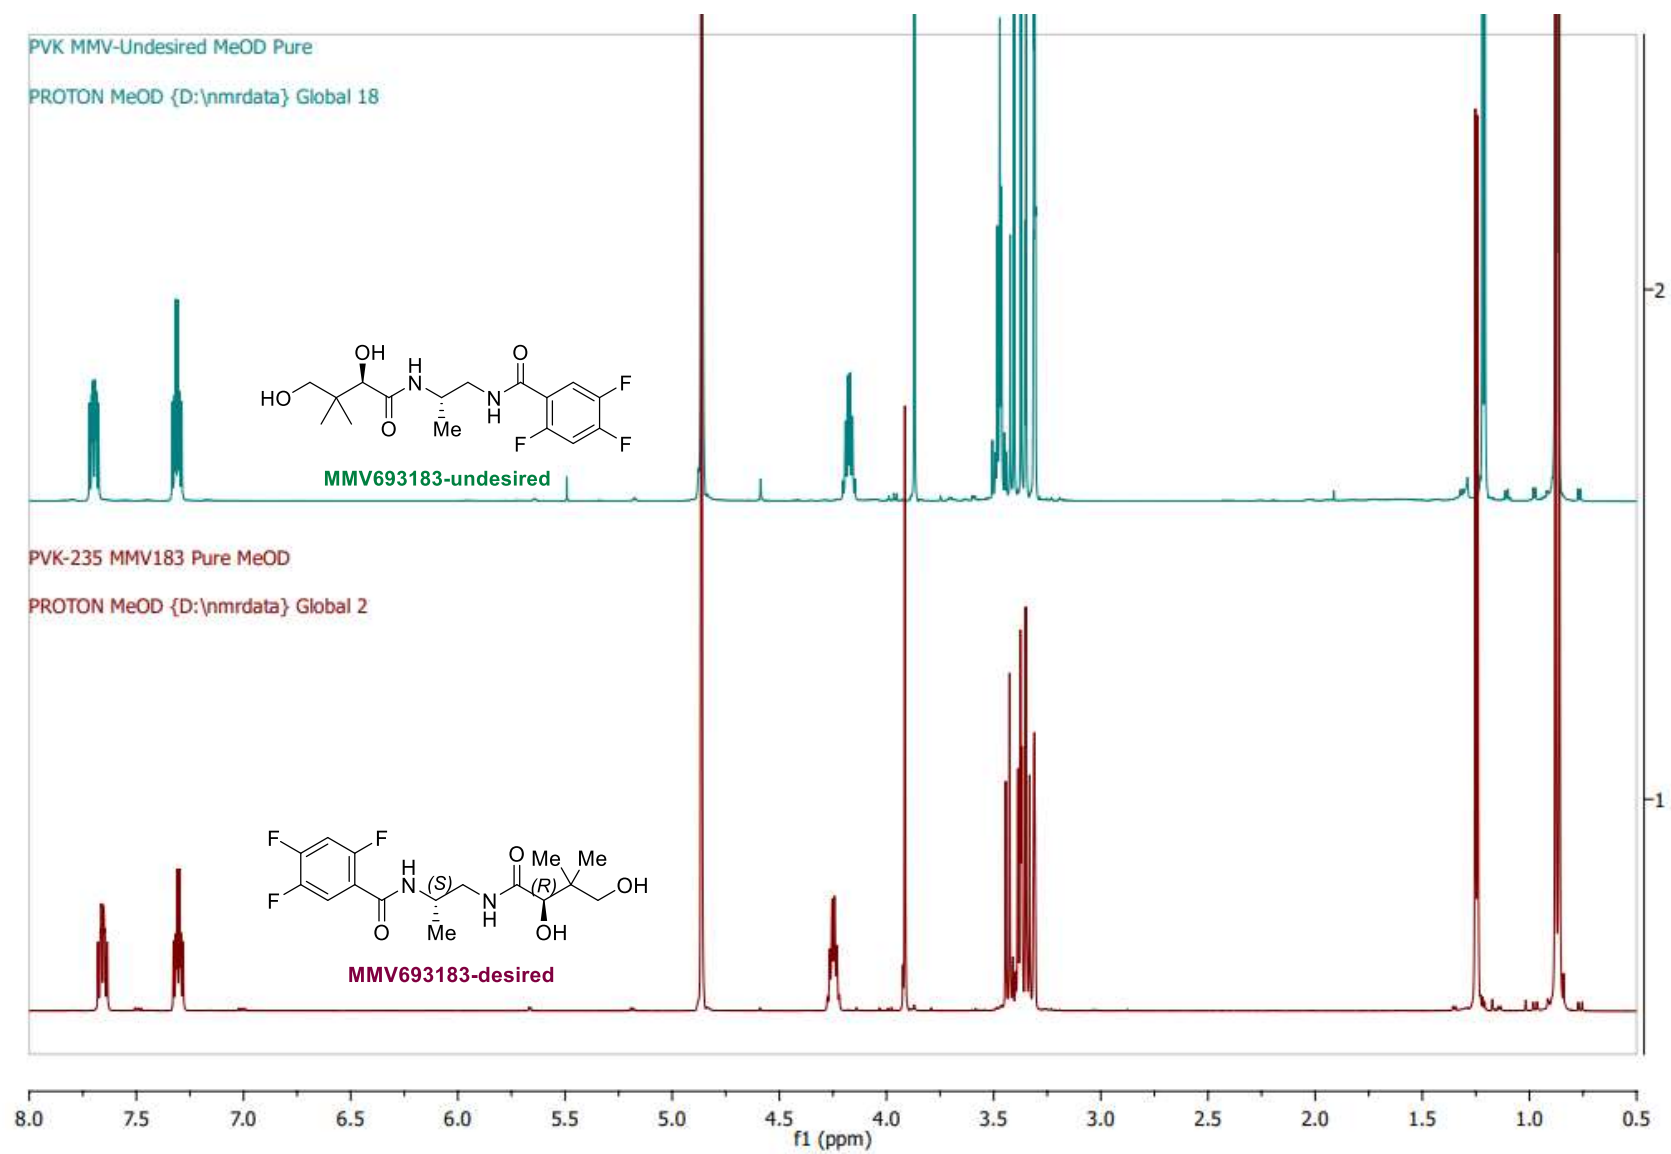

**Fig S20.**  $^1\text{H}$ NMR data comparison of MMV693183 (desired and undesired regisomers) in  $\text{CD}_3\text{OD}$

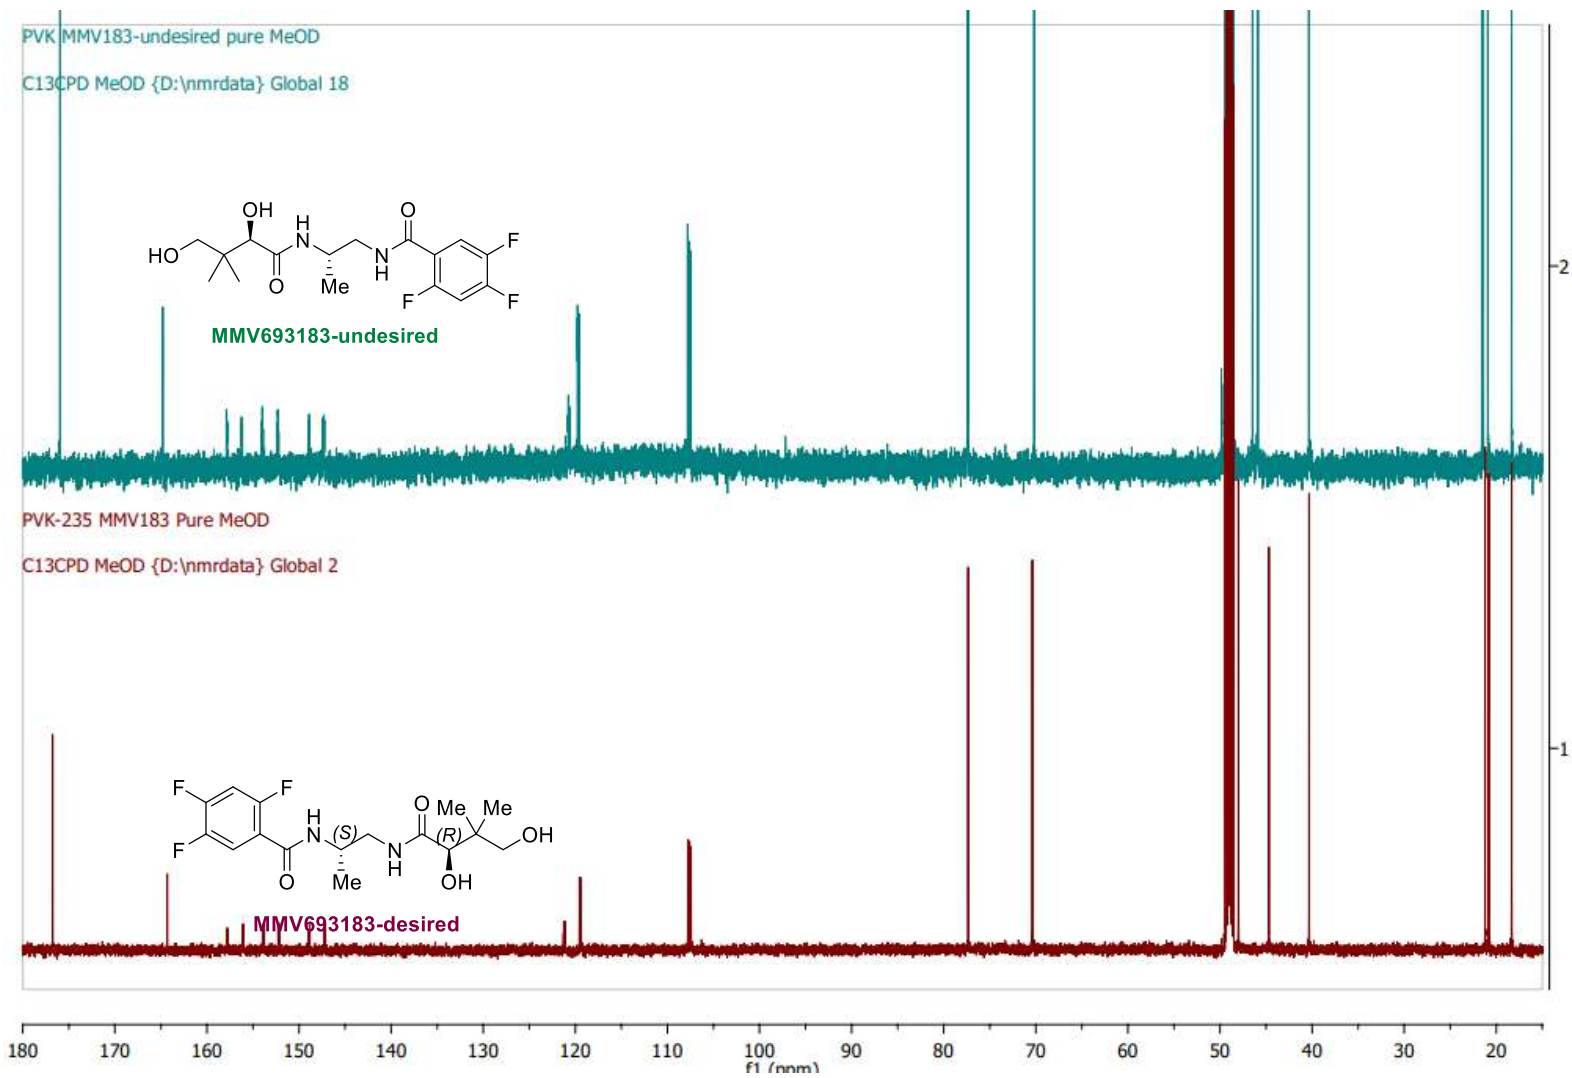

**Fig S21.**  $^{13}\text{C}$ NMR data comparison of MMV693183 (desired and undesired regioisomers) in  $\text{CD}_3\text{OD}$
